# Supplementary material for: Systematic review and meta-analysis of human transcriptomics reveals neuroinflammation, deficient energy metabolism, and proteostasis failure across neurodegeneration
Source: PubMed Central journal article supplement — Neurobiol Dis. Author manuscript; Available in PMC 2021 Feb 3. (PMC7856076; doi:10.1016/j.nbd.2020.105225), 2020-12-19

## A Z-Score Distribution

### AD Meta-Analysis

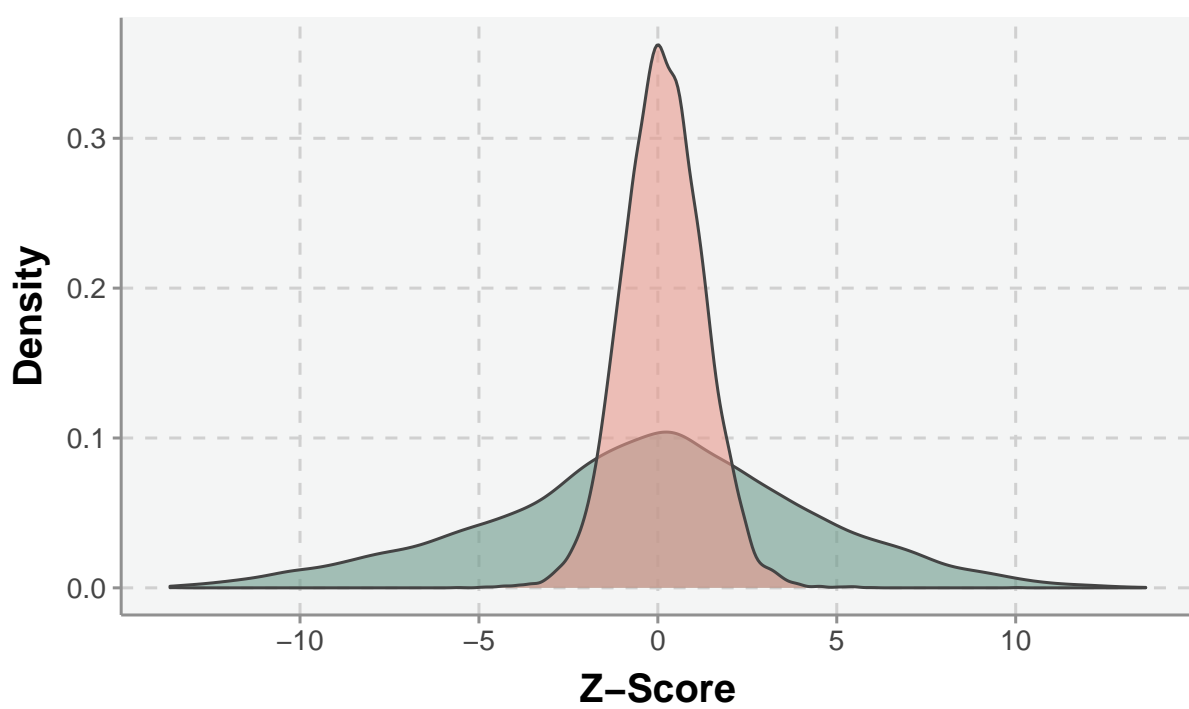

### LBD Meta-Analysis

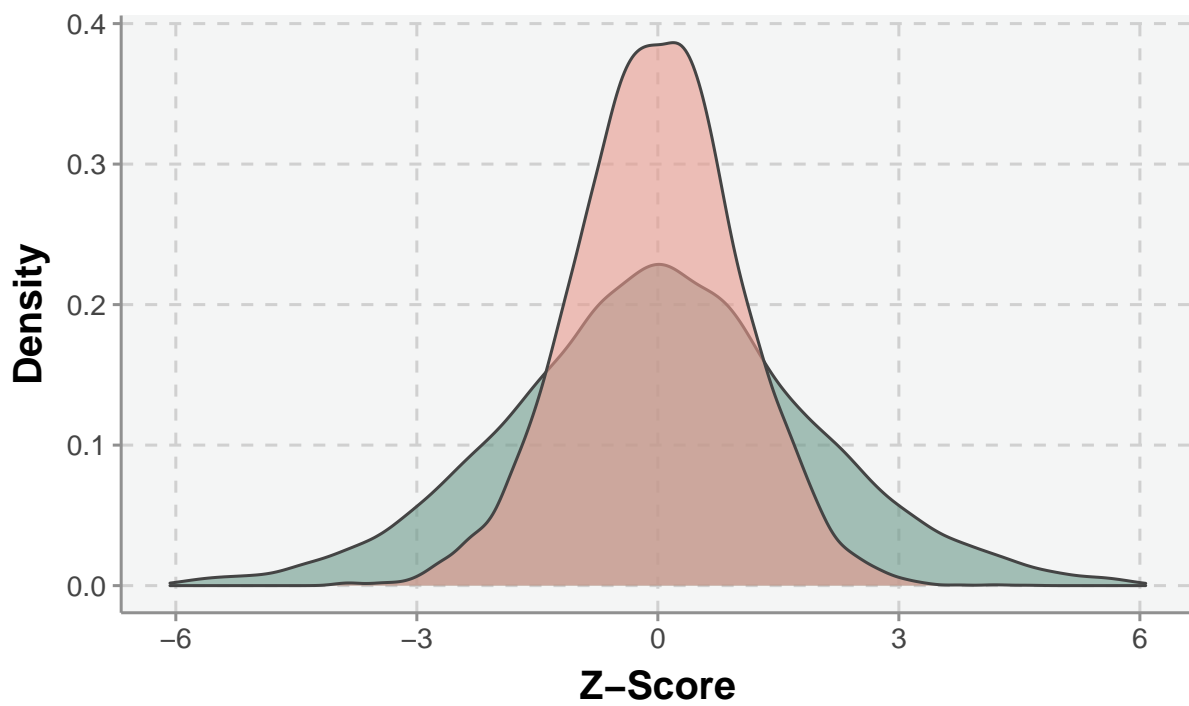

### ALS Meta-Analysis

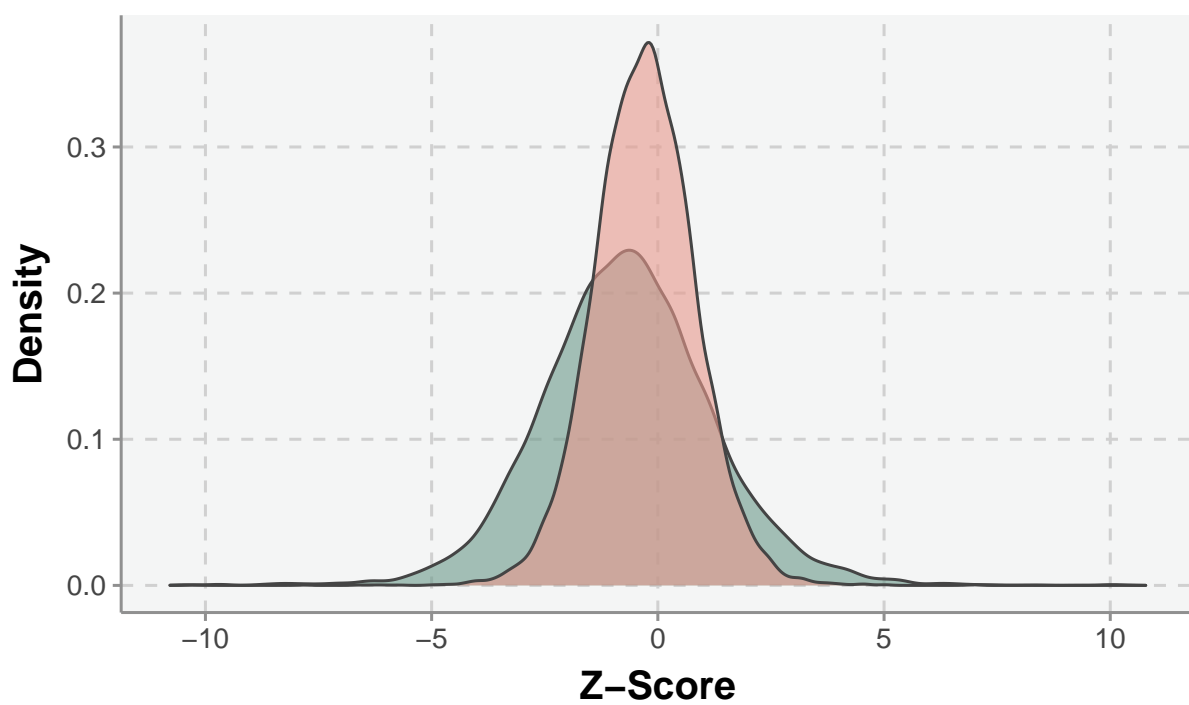

Label █ Original █ Scrambled

## B Upregulated Pathway Overlap

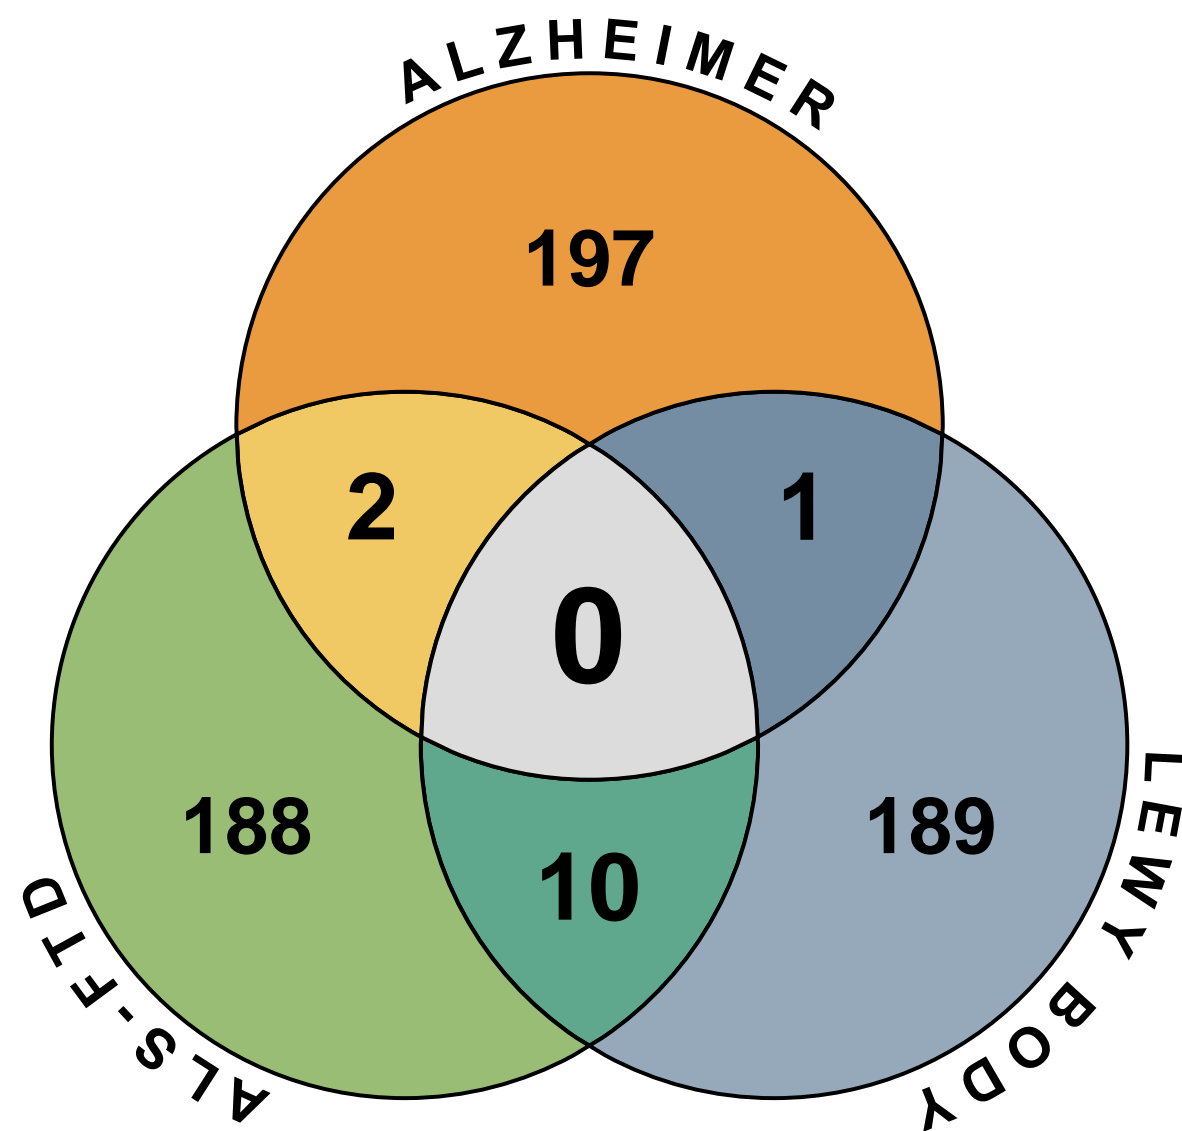

## C Downregulated Pathway Overlap

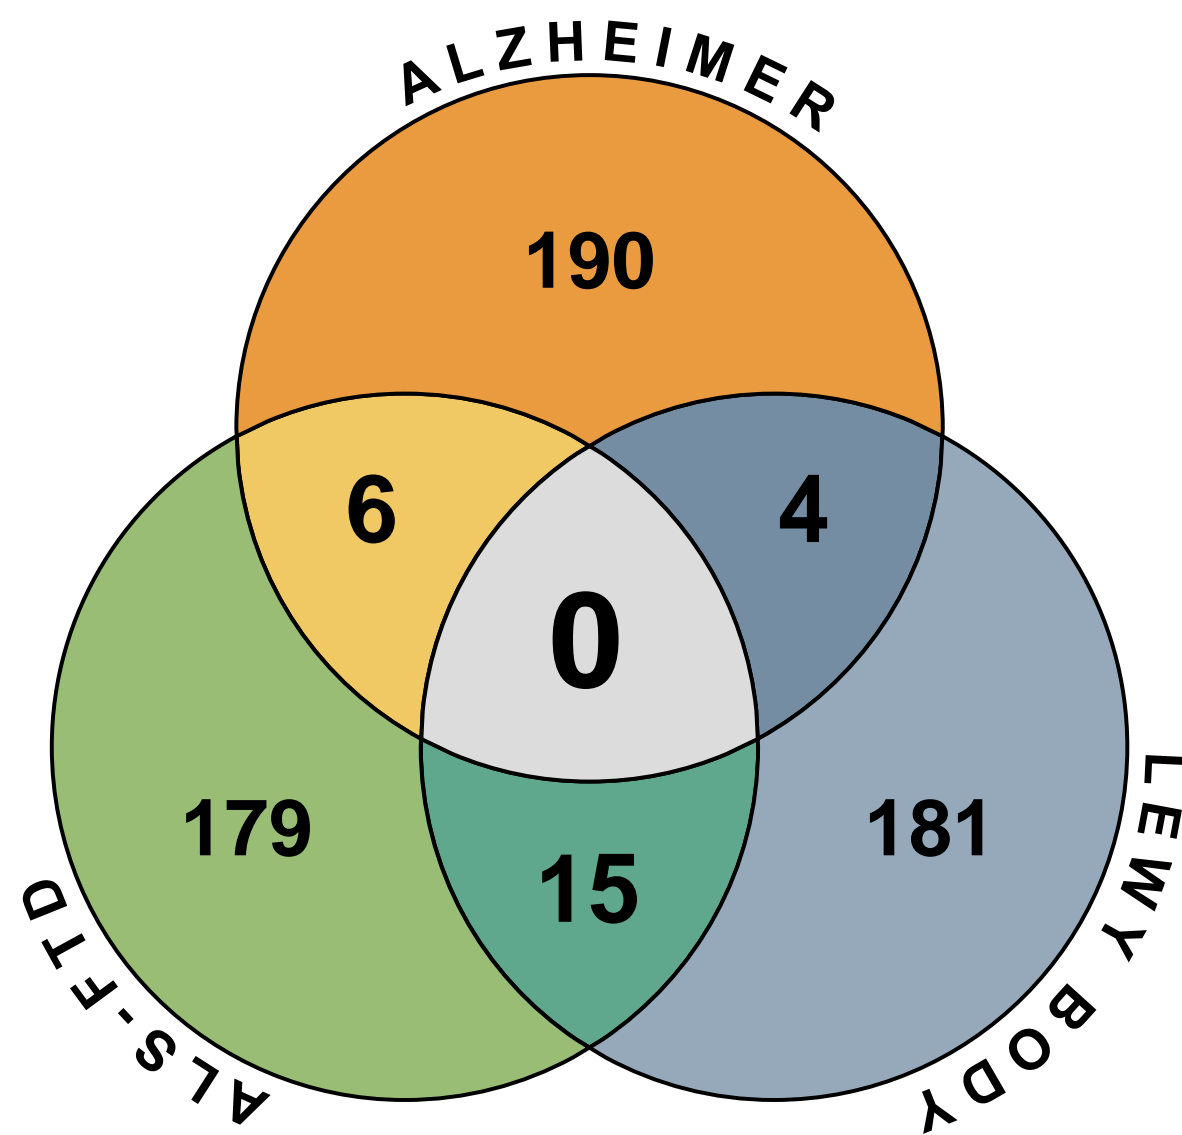

Supplement: NIHMS1658935-supplement-Figure_S1.pdf [file NIHMS1658935-supplement-Figure_S1.pdf]
