# Supplementary material for: Systematic review and meta-analysis of human transcriptomics reveals neuroinflammation, deficient energy metabolism, and proteostasis failure across neurodegeneration
Source: PubMed Central journal article supplement — Neurobiol Dis. Author manuscript; Available in PMC 2021 Feb 3. (PMC7856076; doi:10.1016/j.nbd.2020.105225), 2020-12-19

**A****Phagocytosis****AD Network**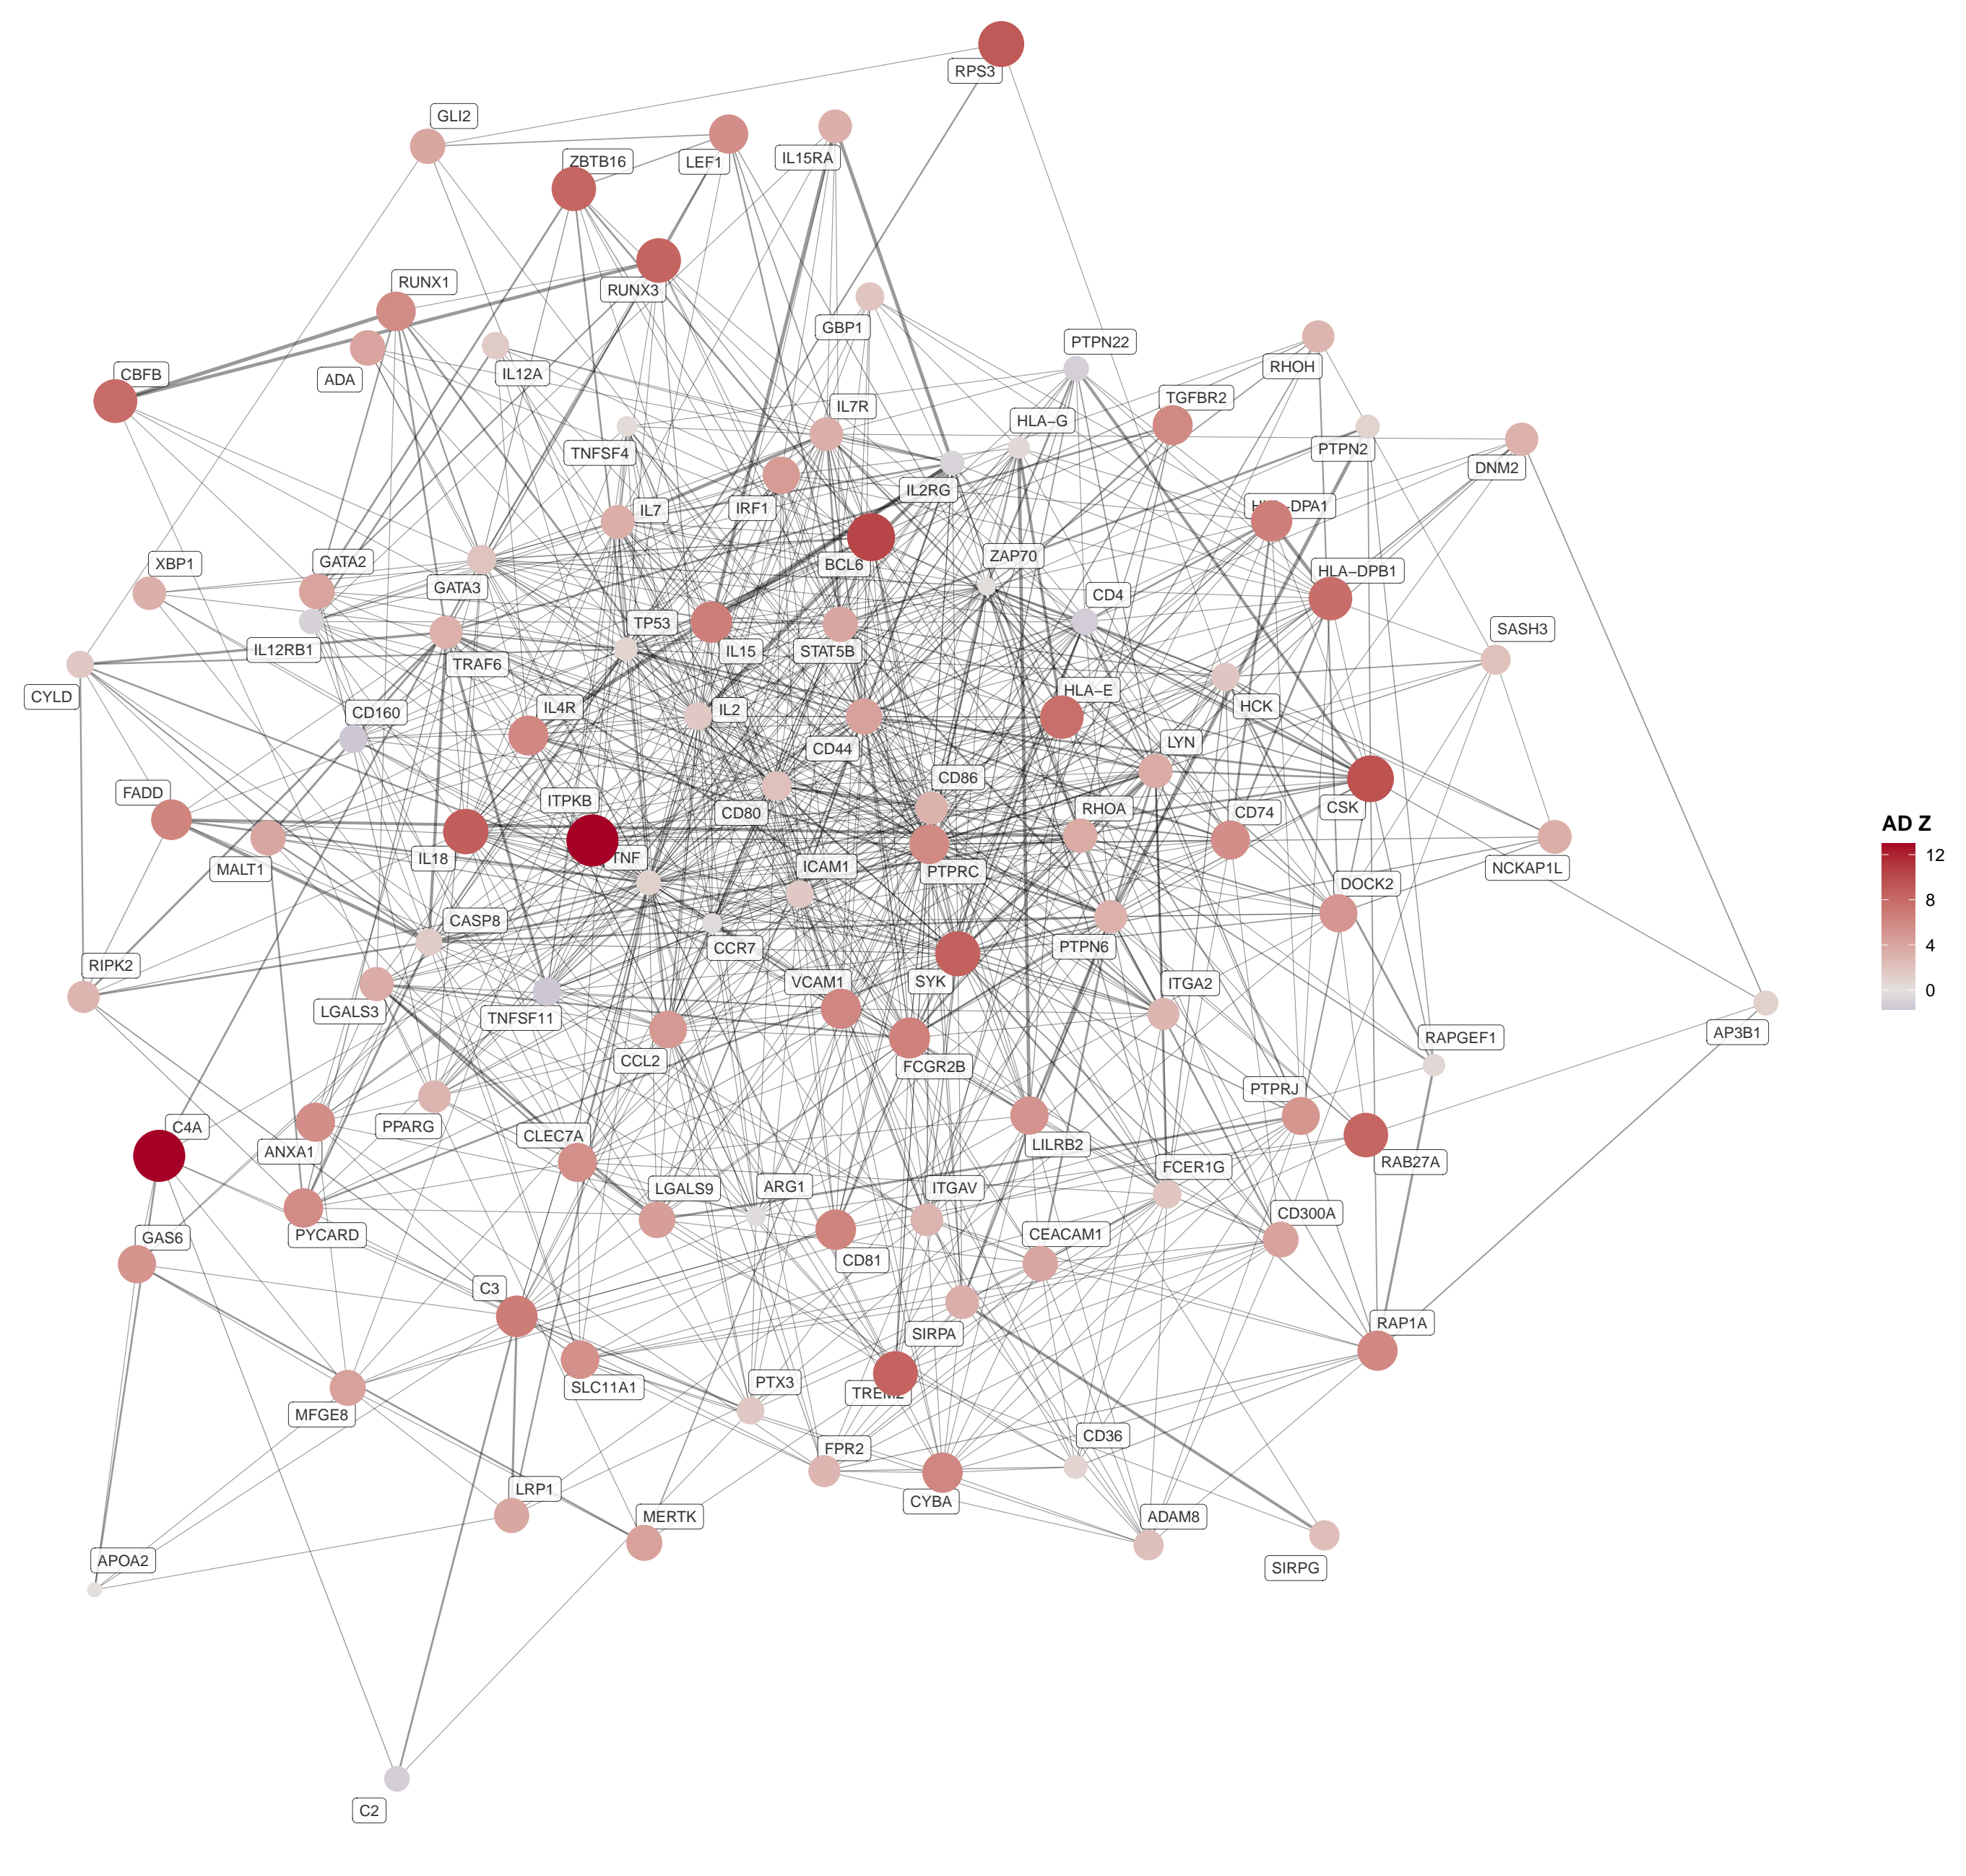**LBD Network**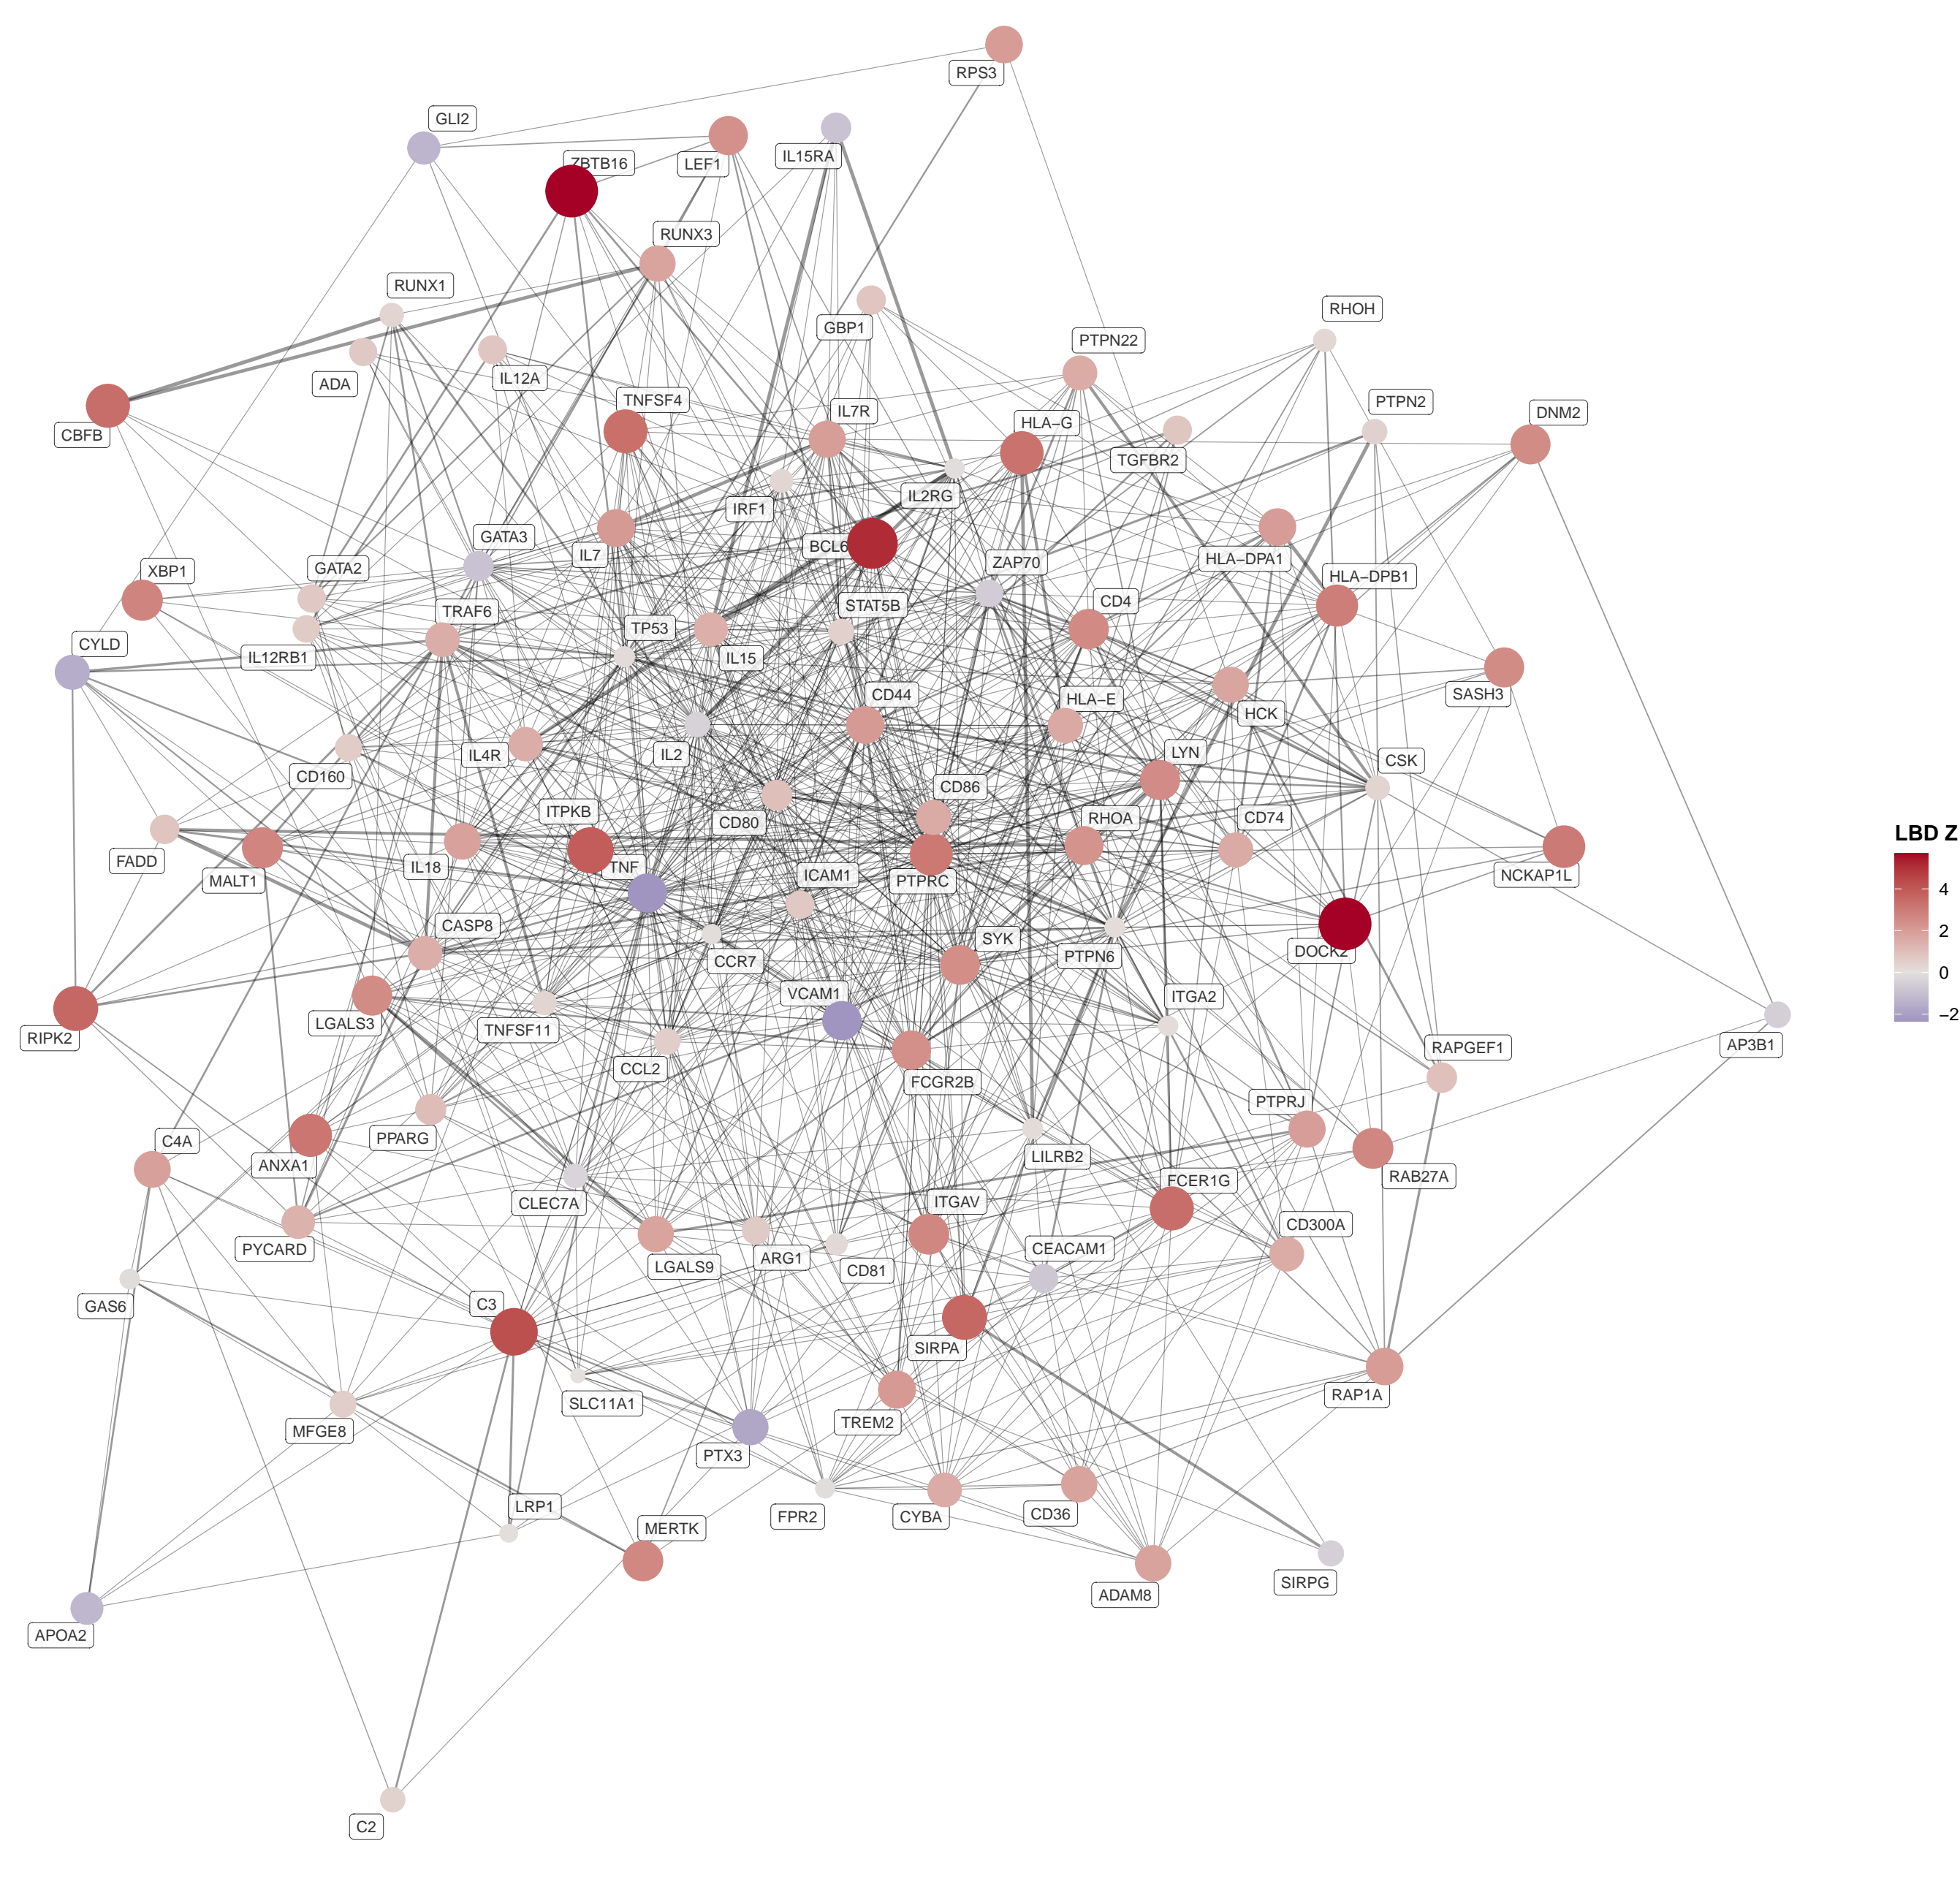**ALS-FTD Network**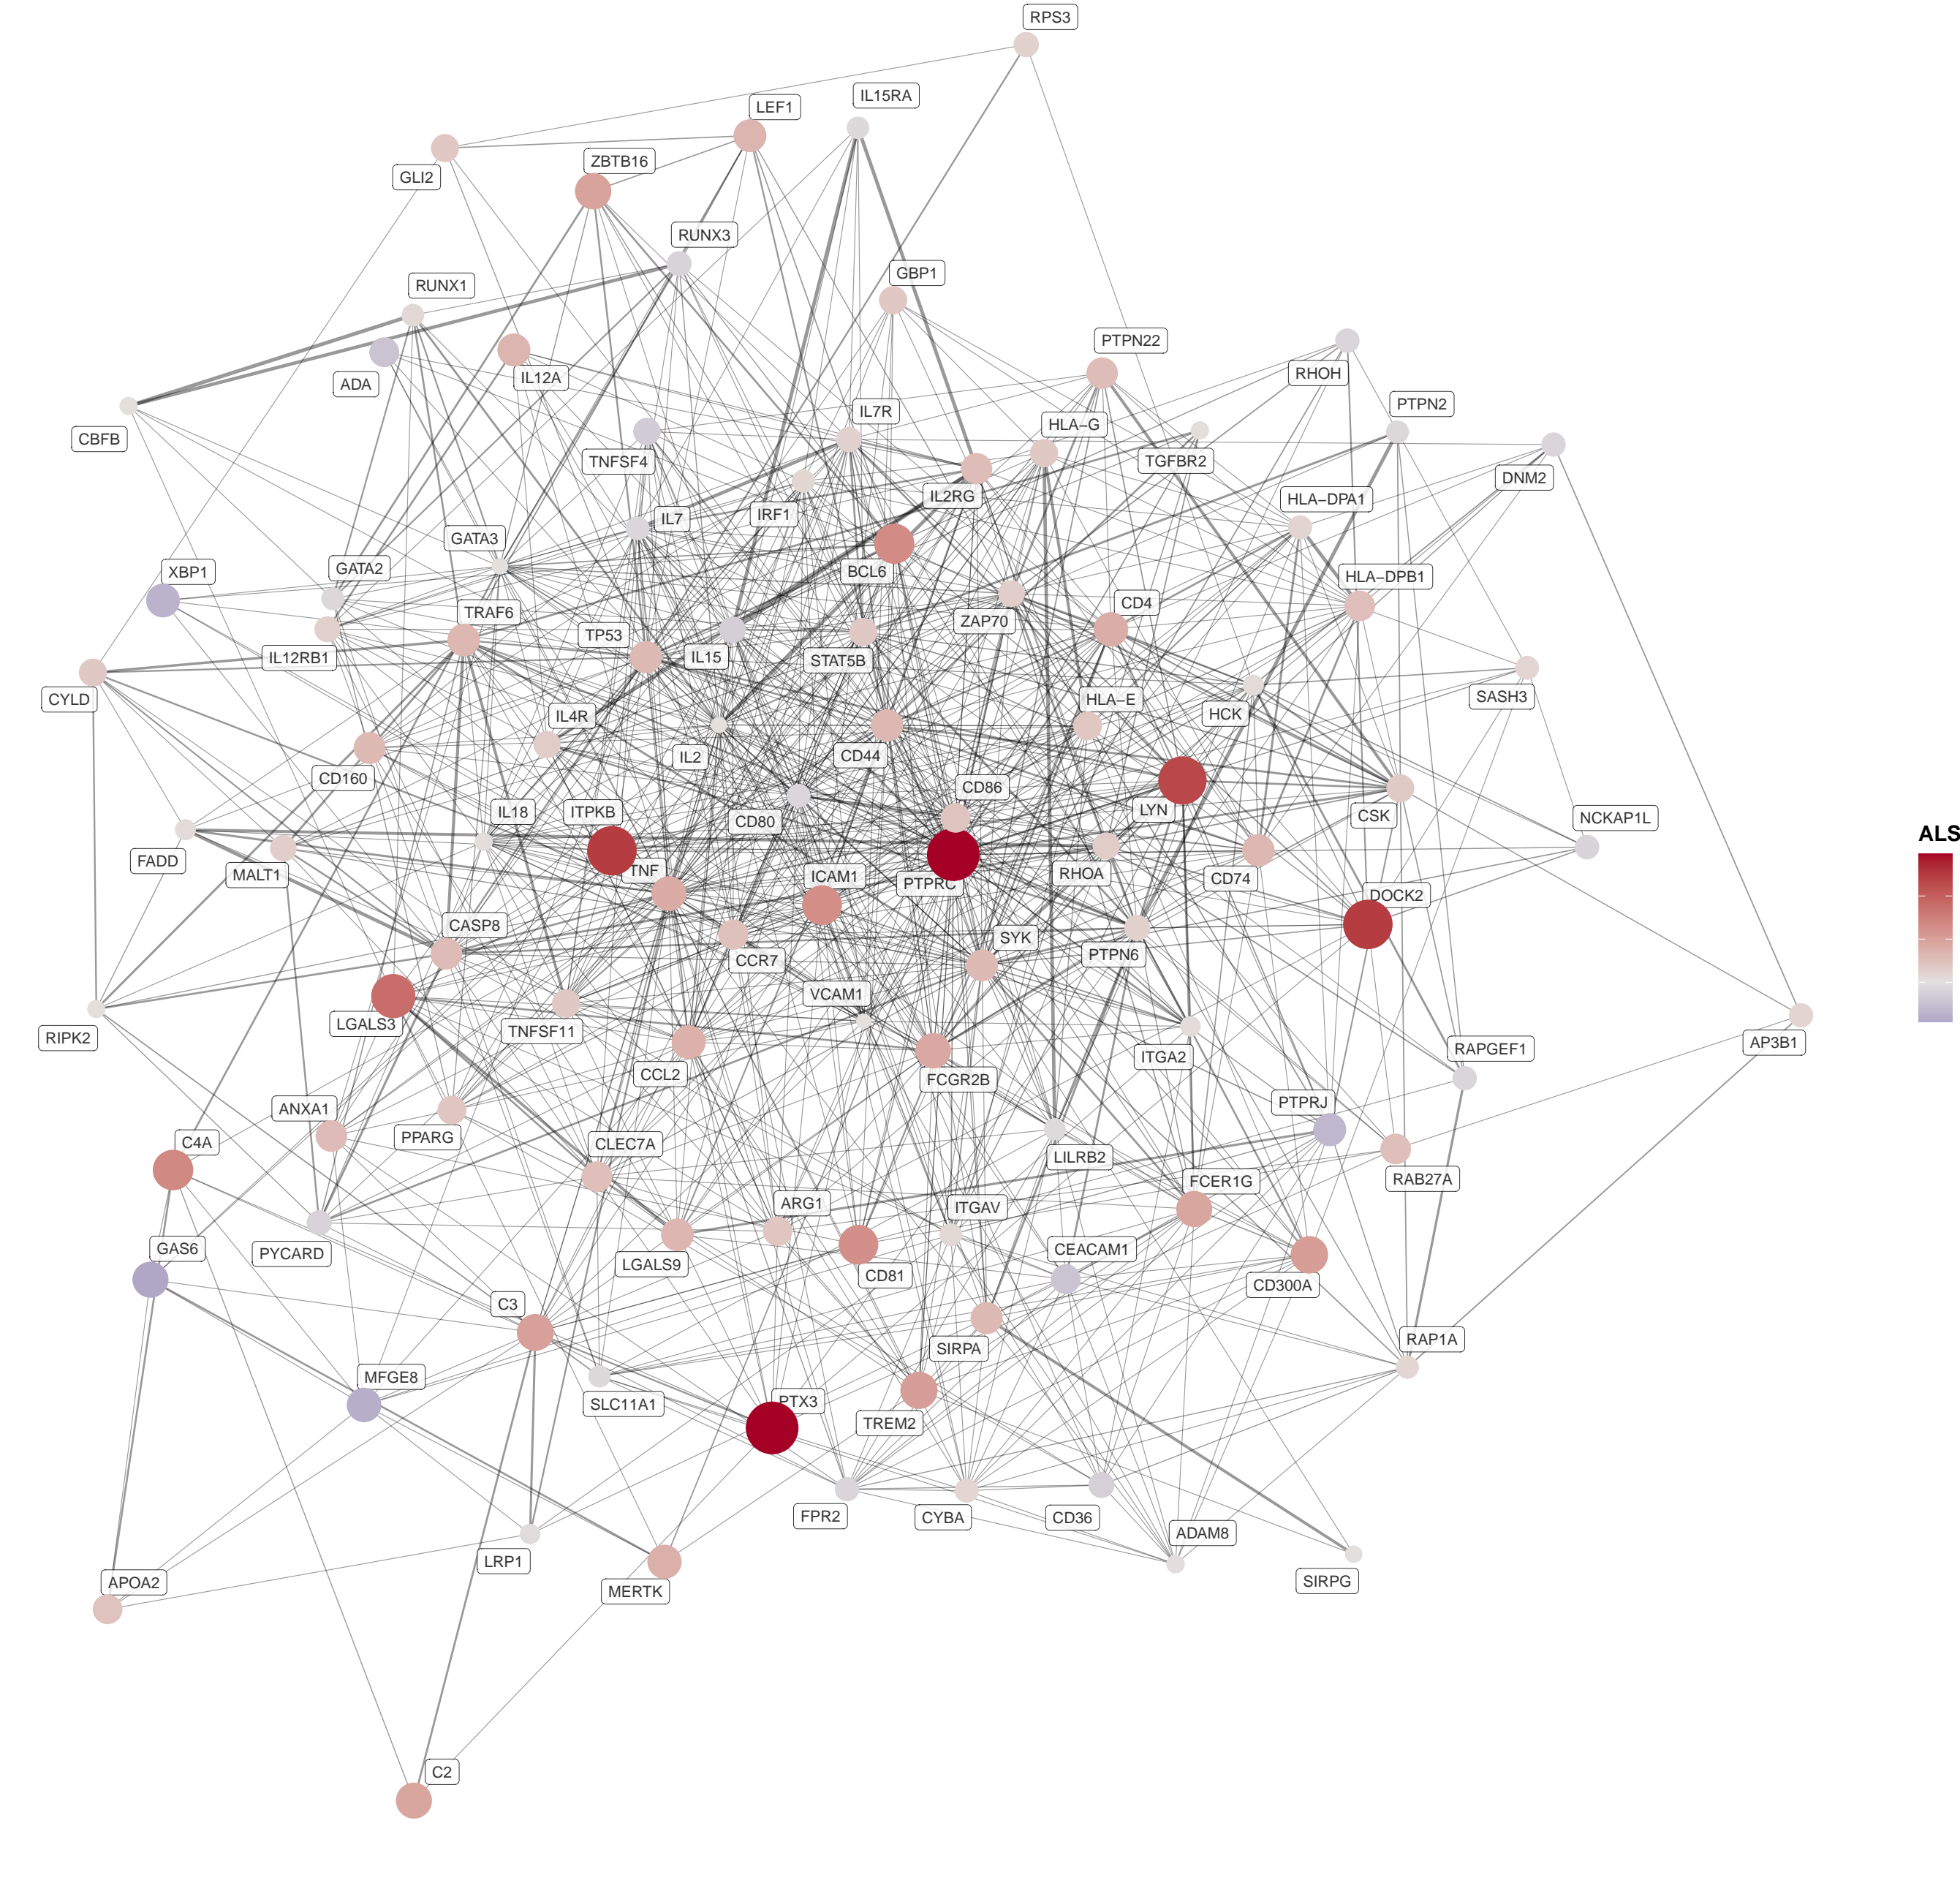**B****Toll-Like Receptor, TNF, and NFkB Signaling****AD Network**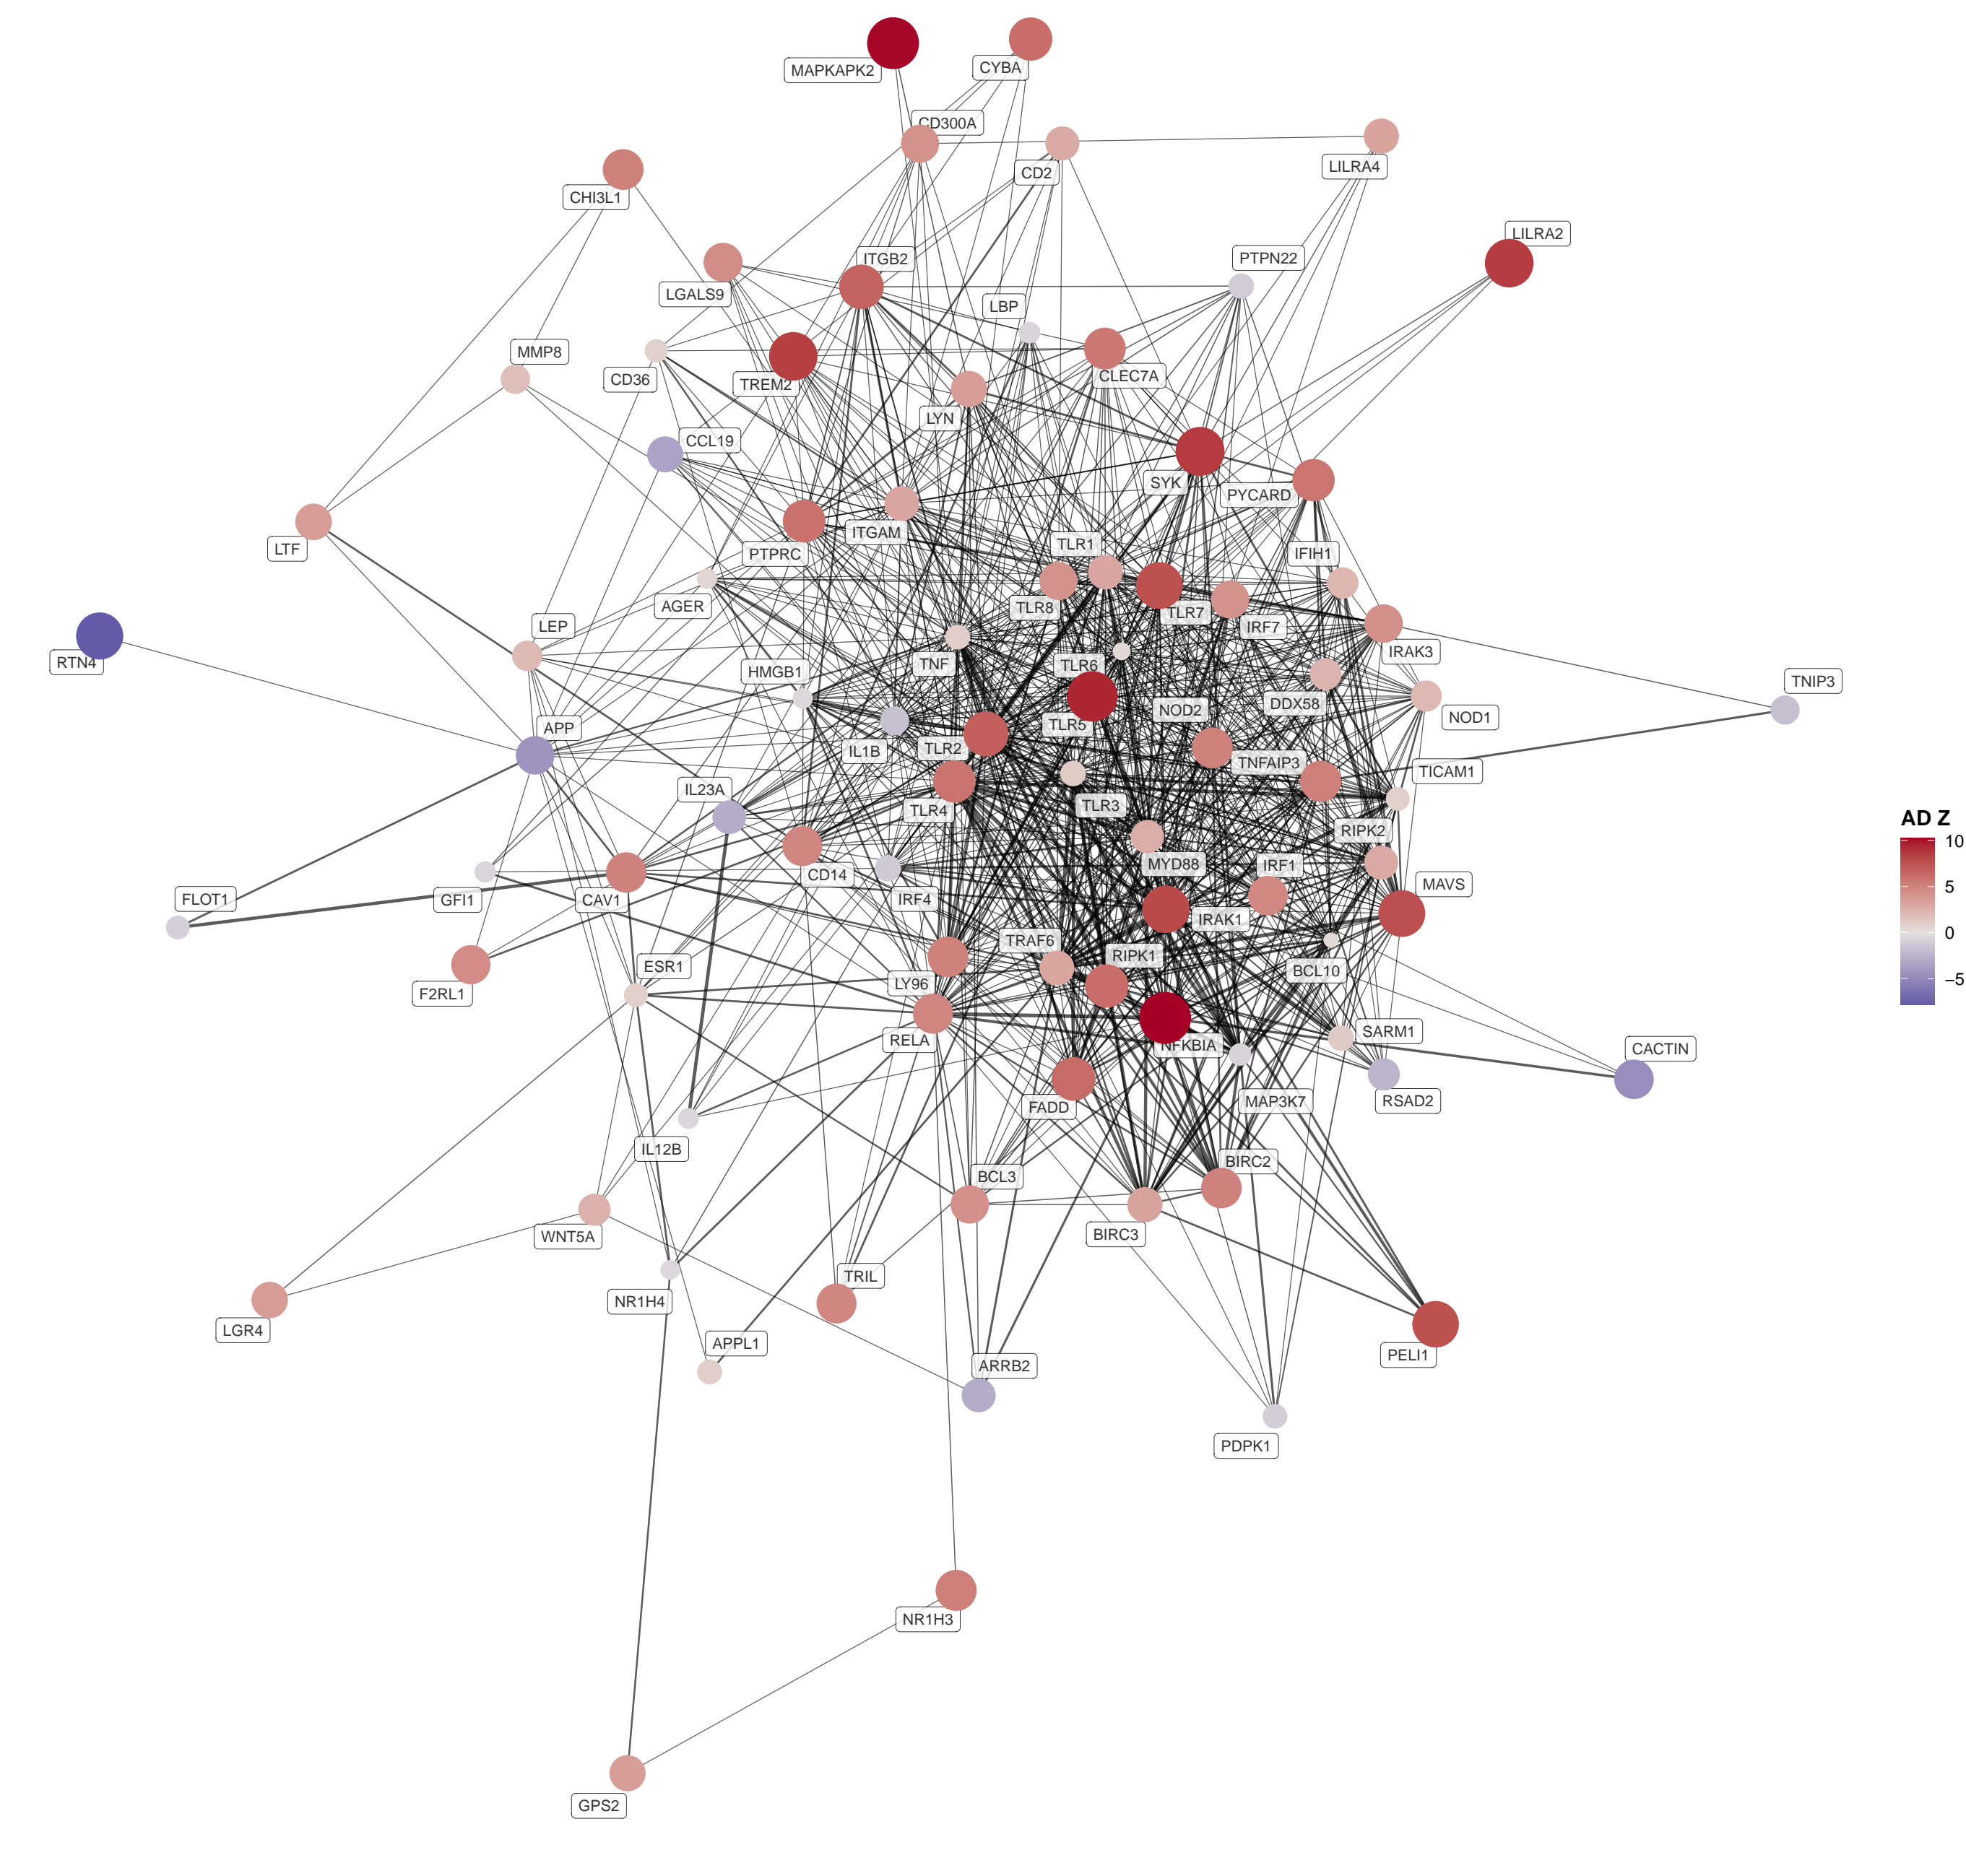**LBD Network**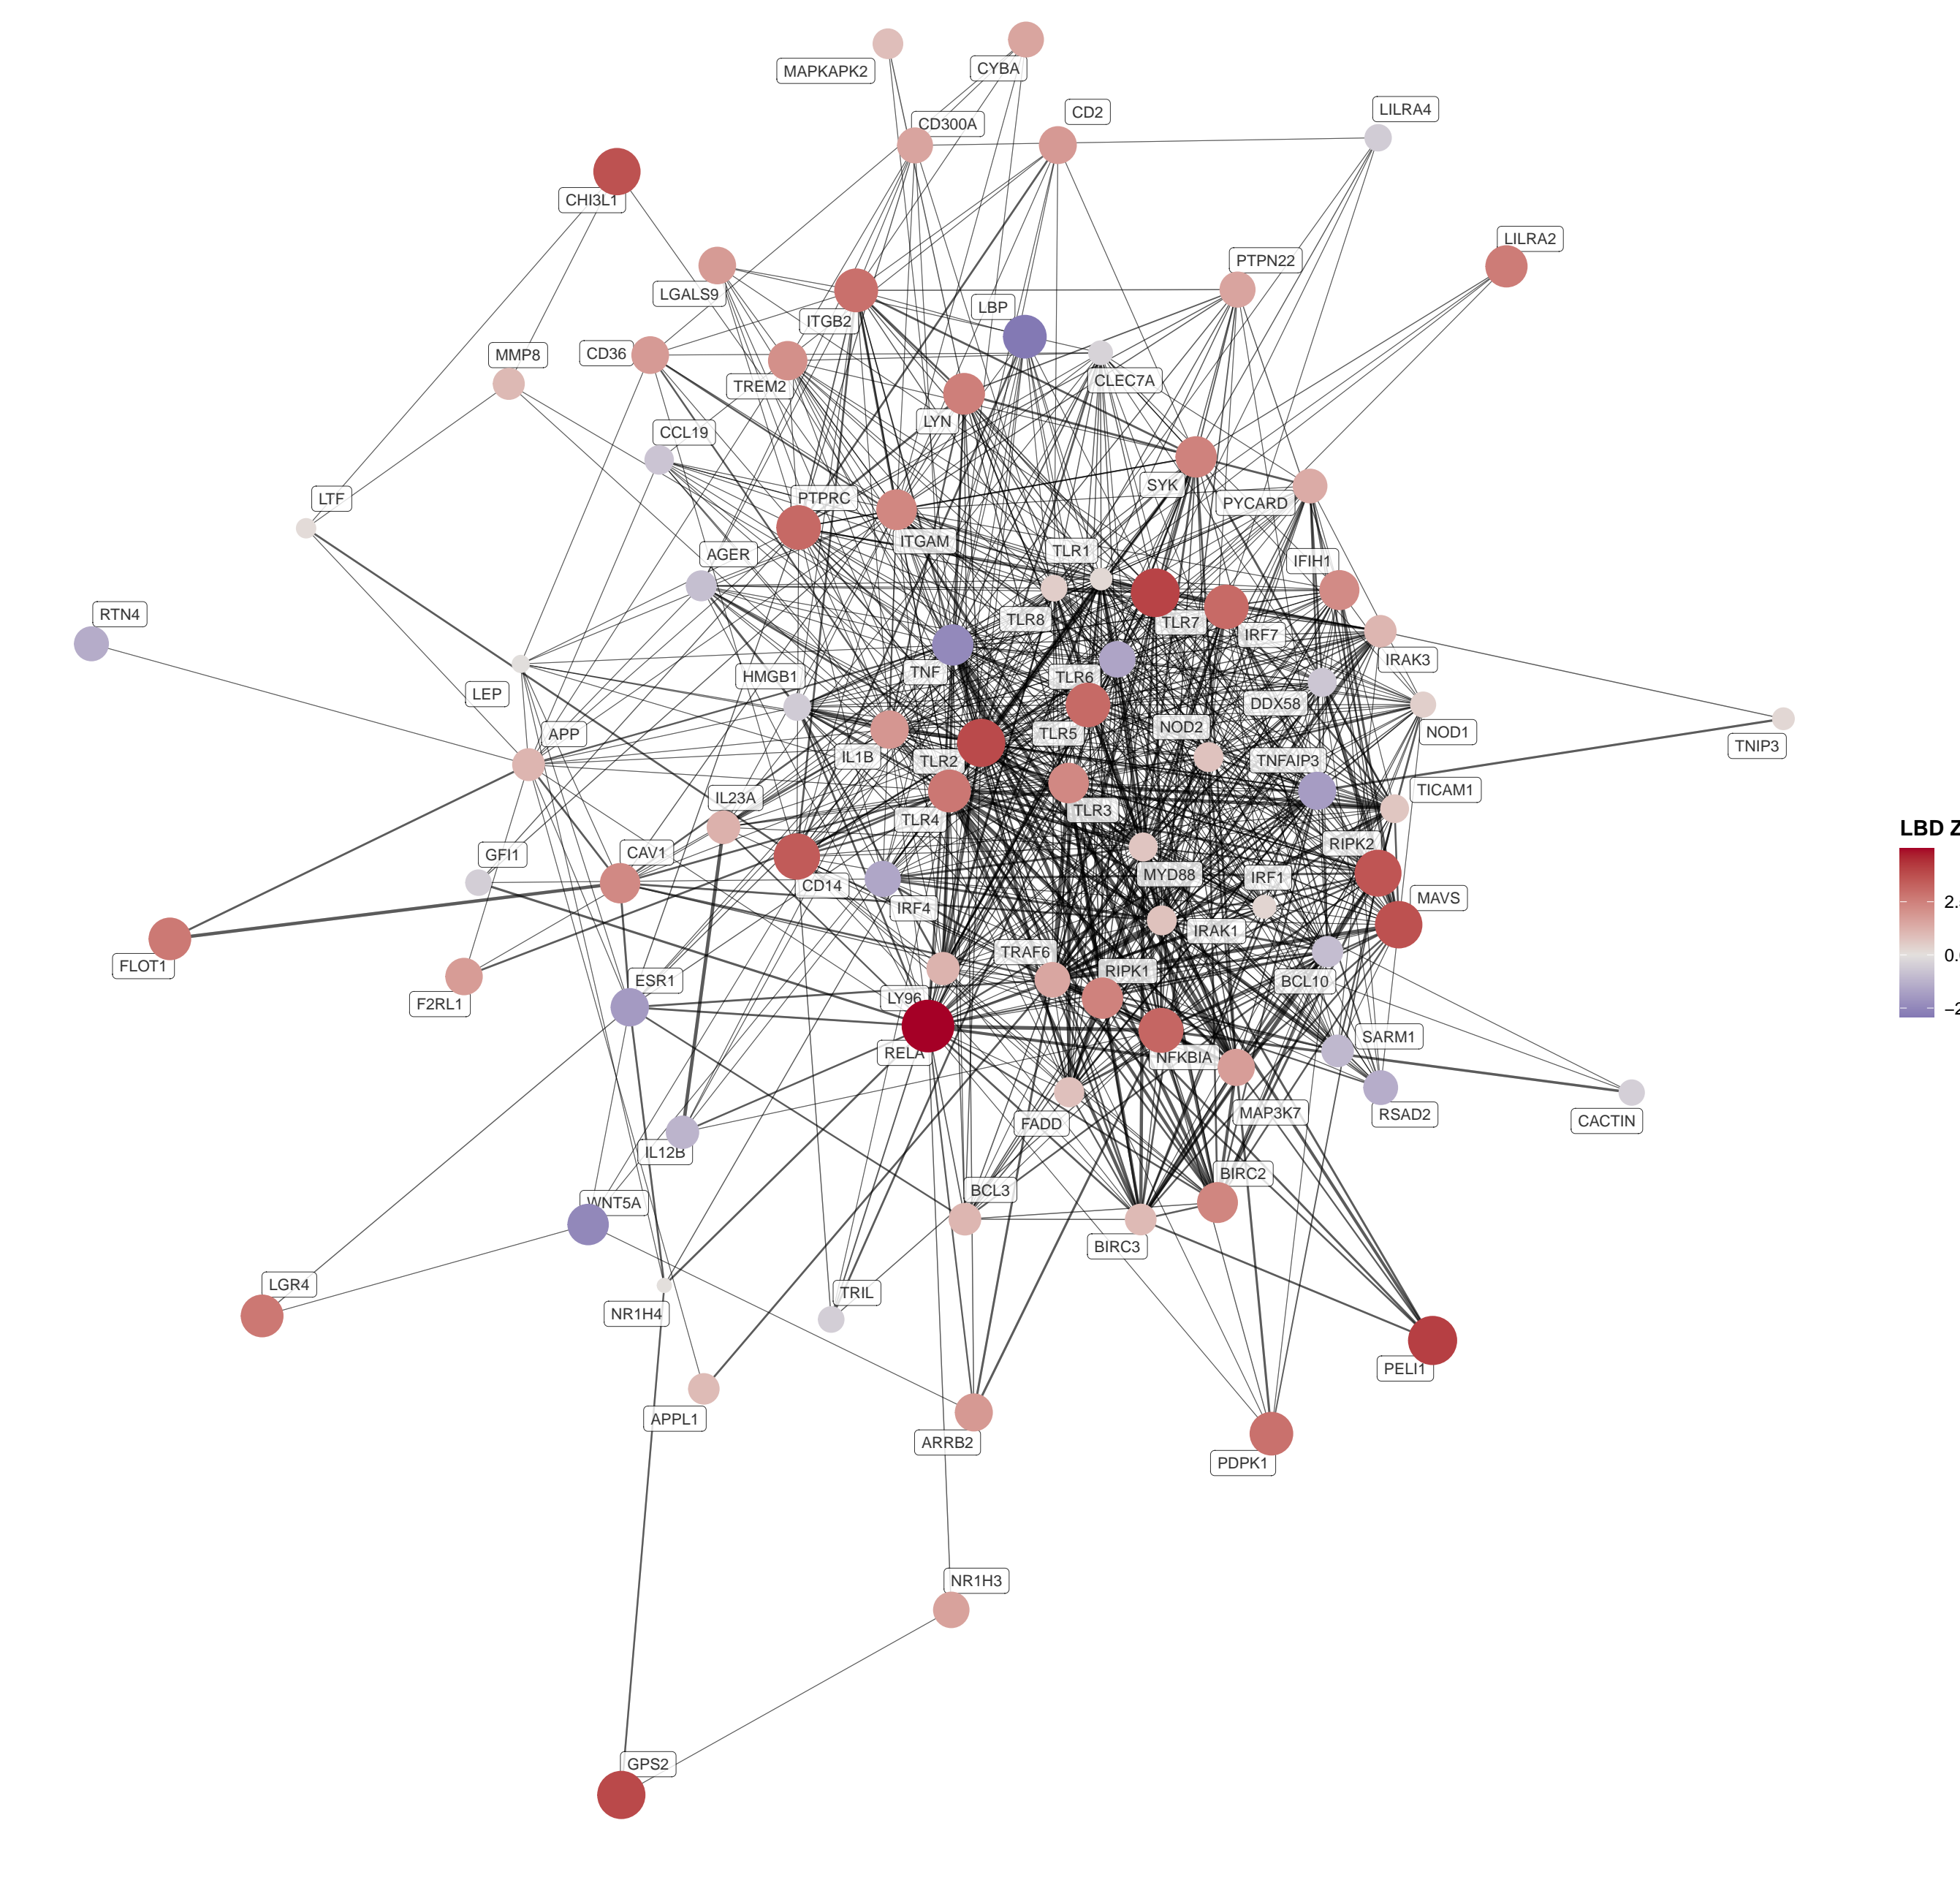**ALS-FTD Network**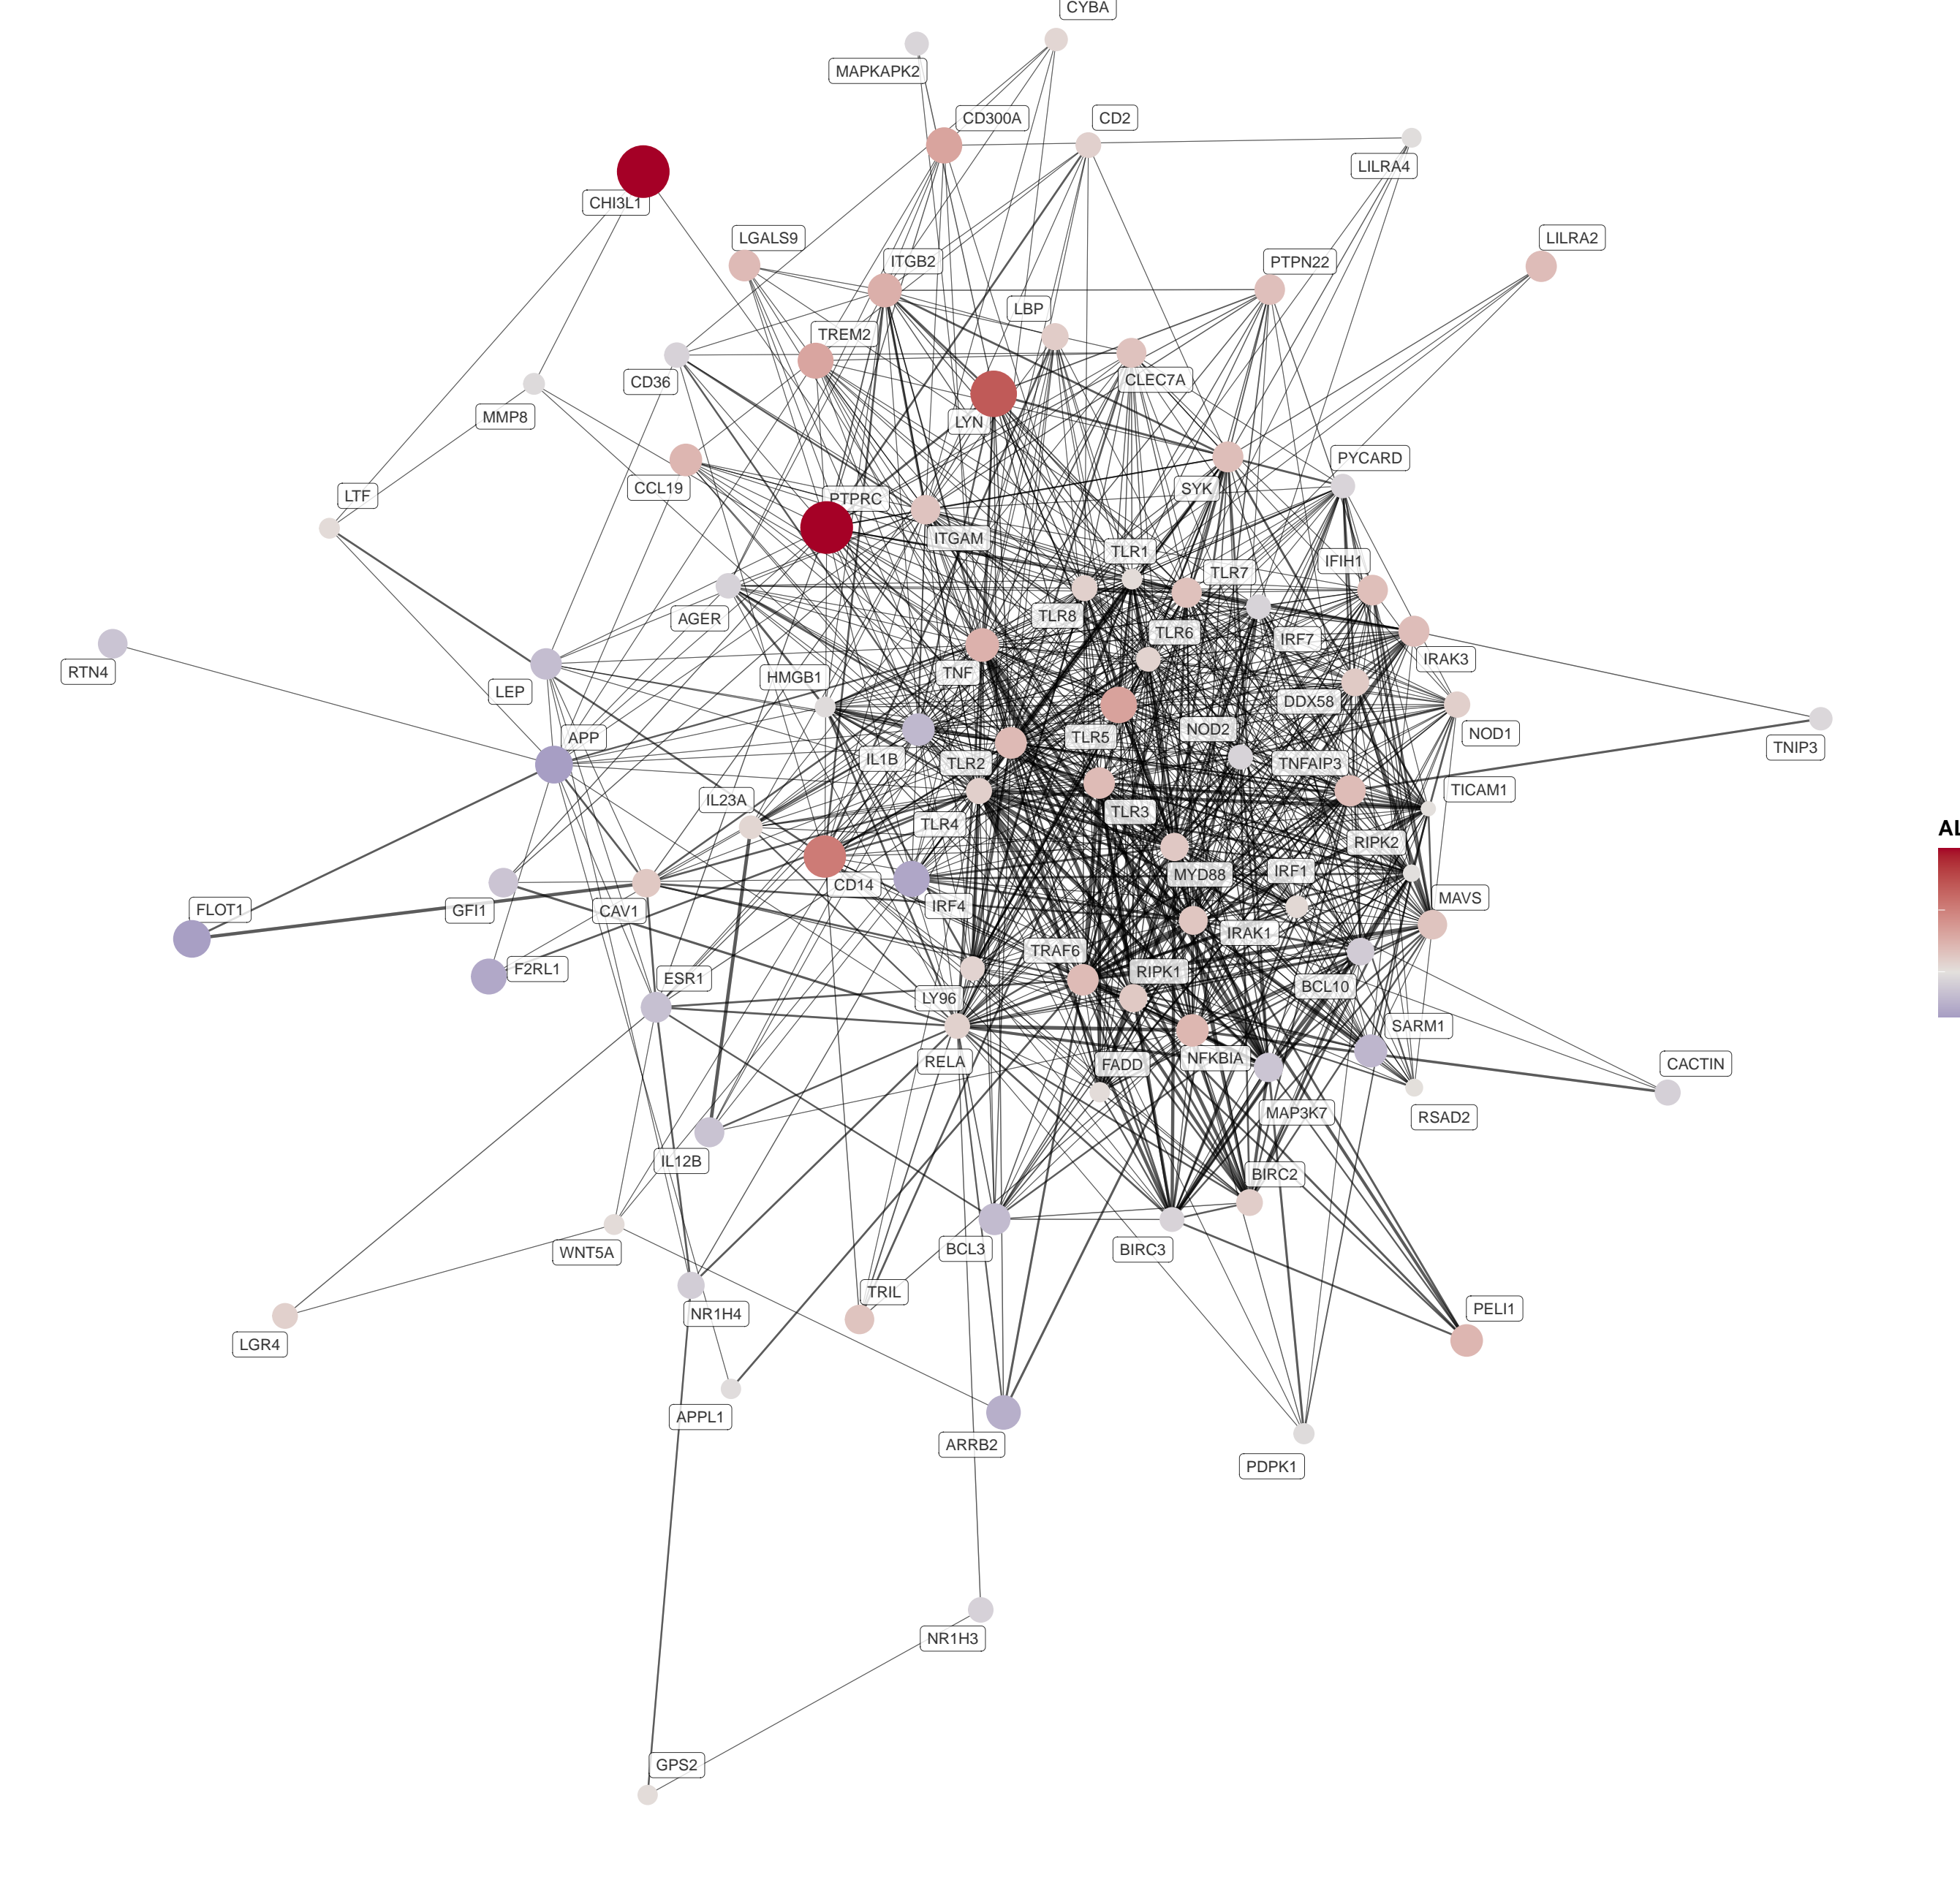**C****Aerobic Respiration and Krebs Cycle****AD Network**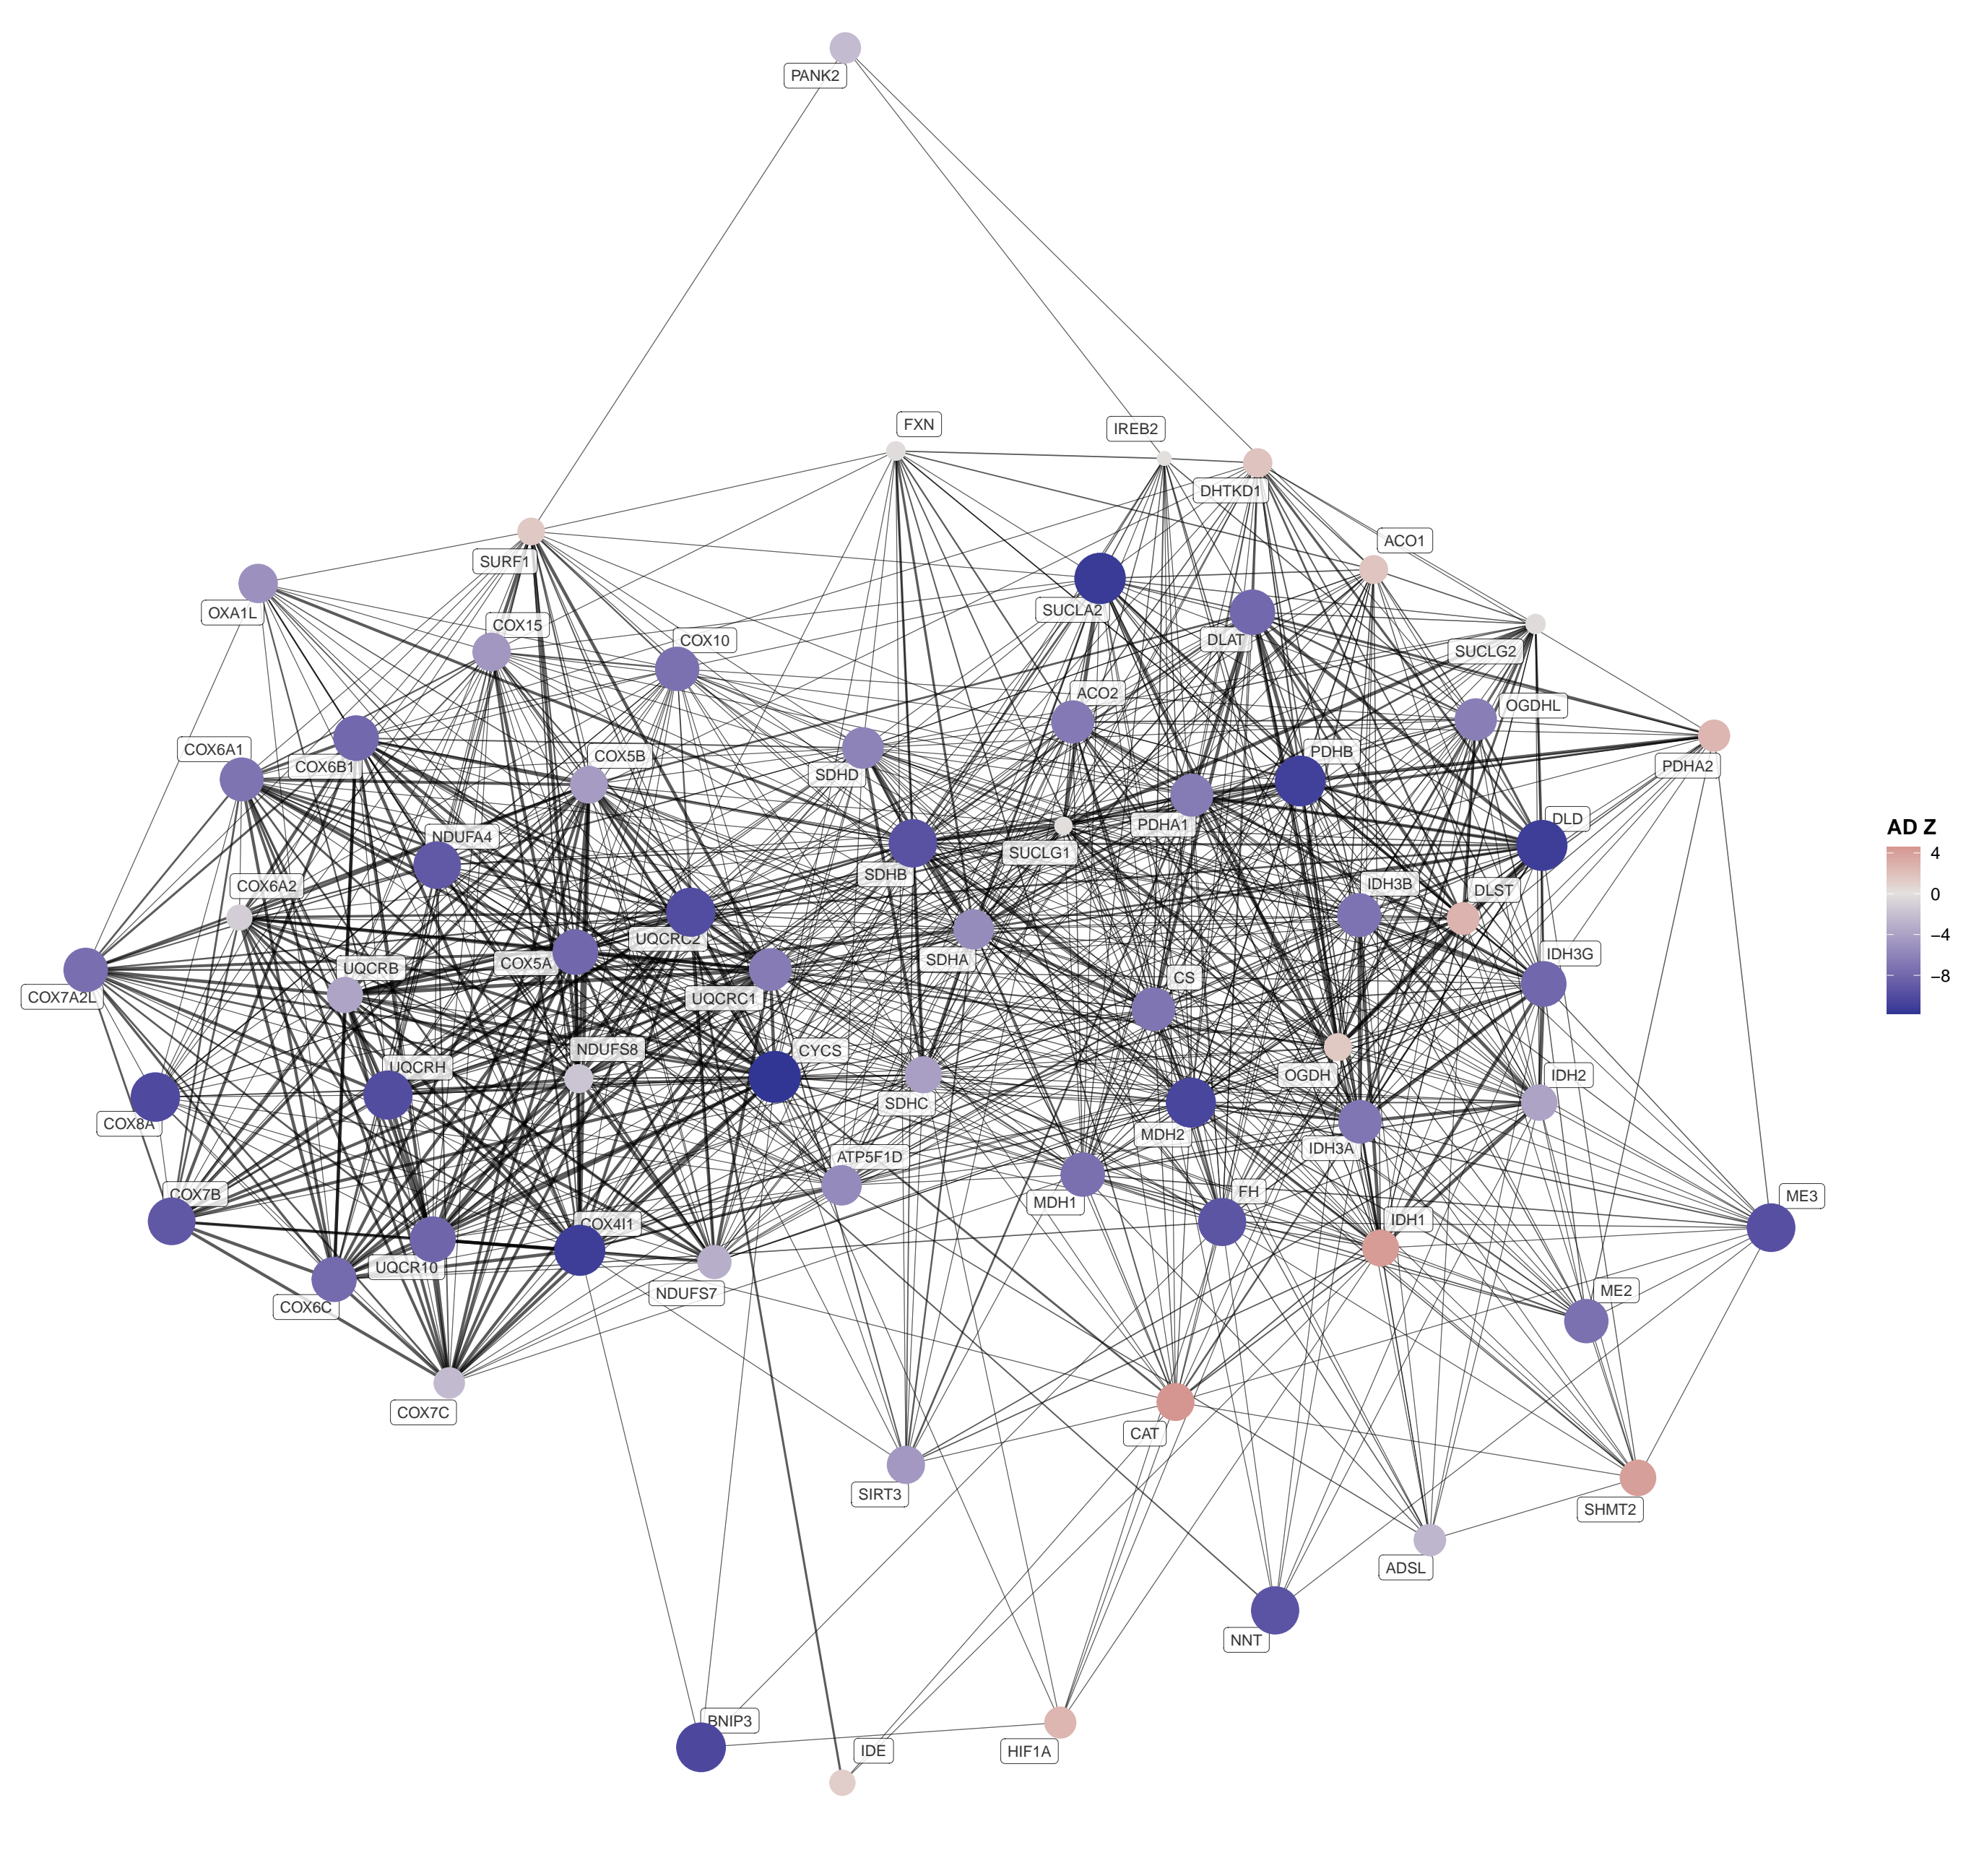**LBD Network**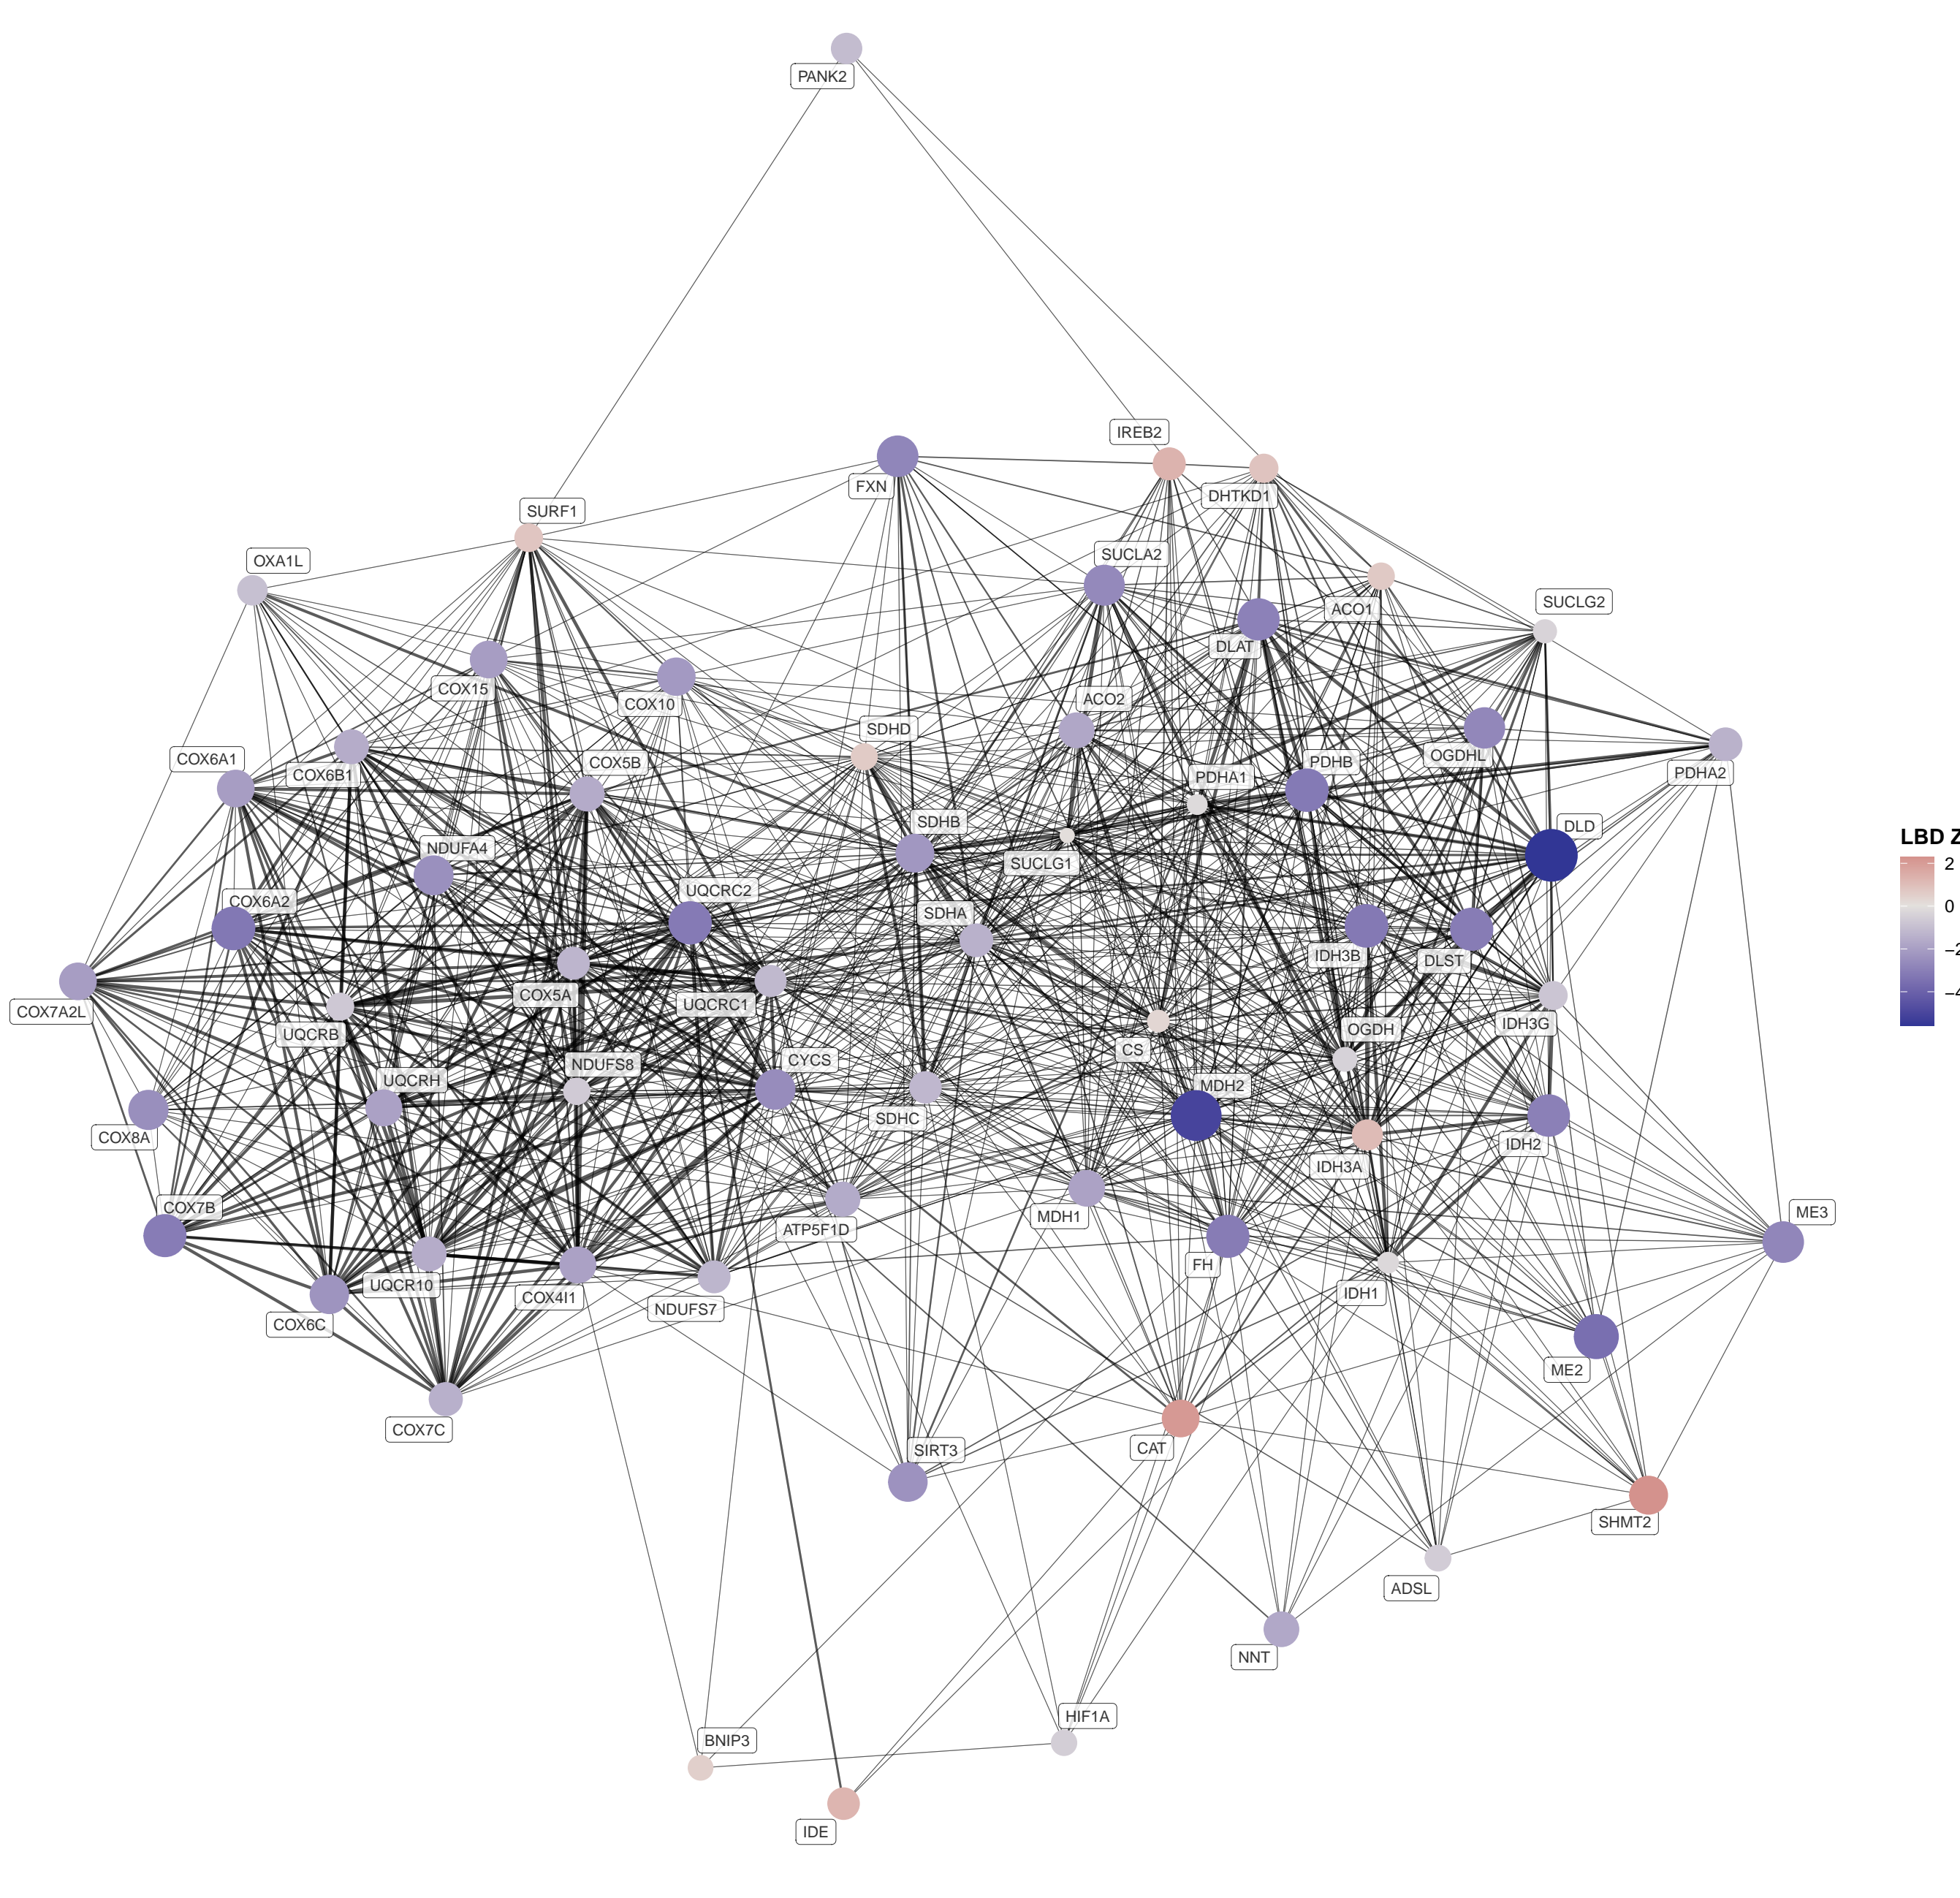**ALS-FTD Network**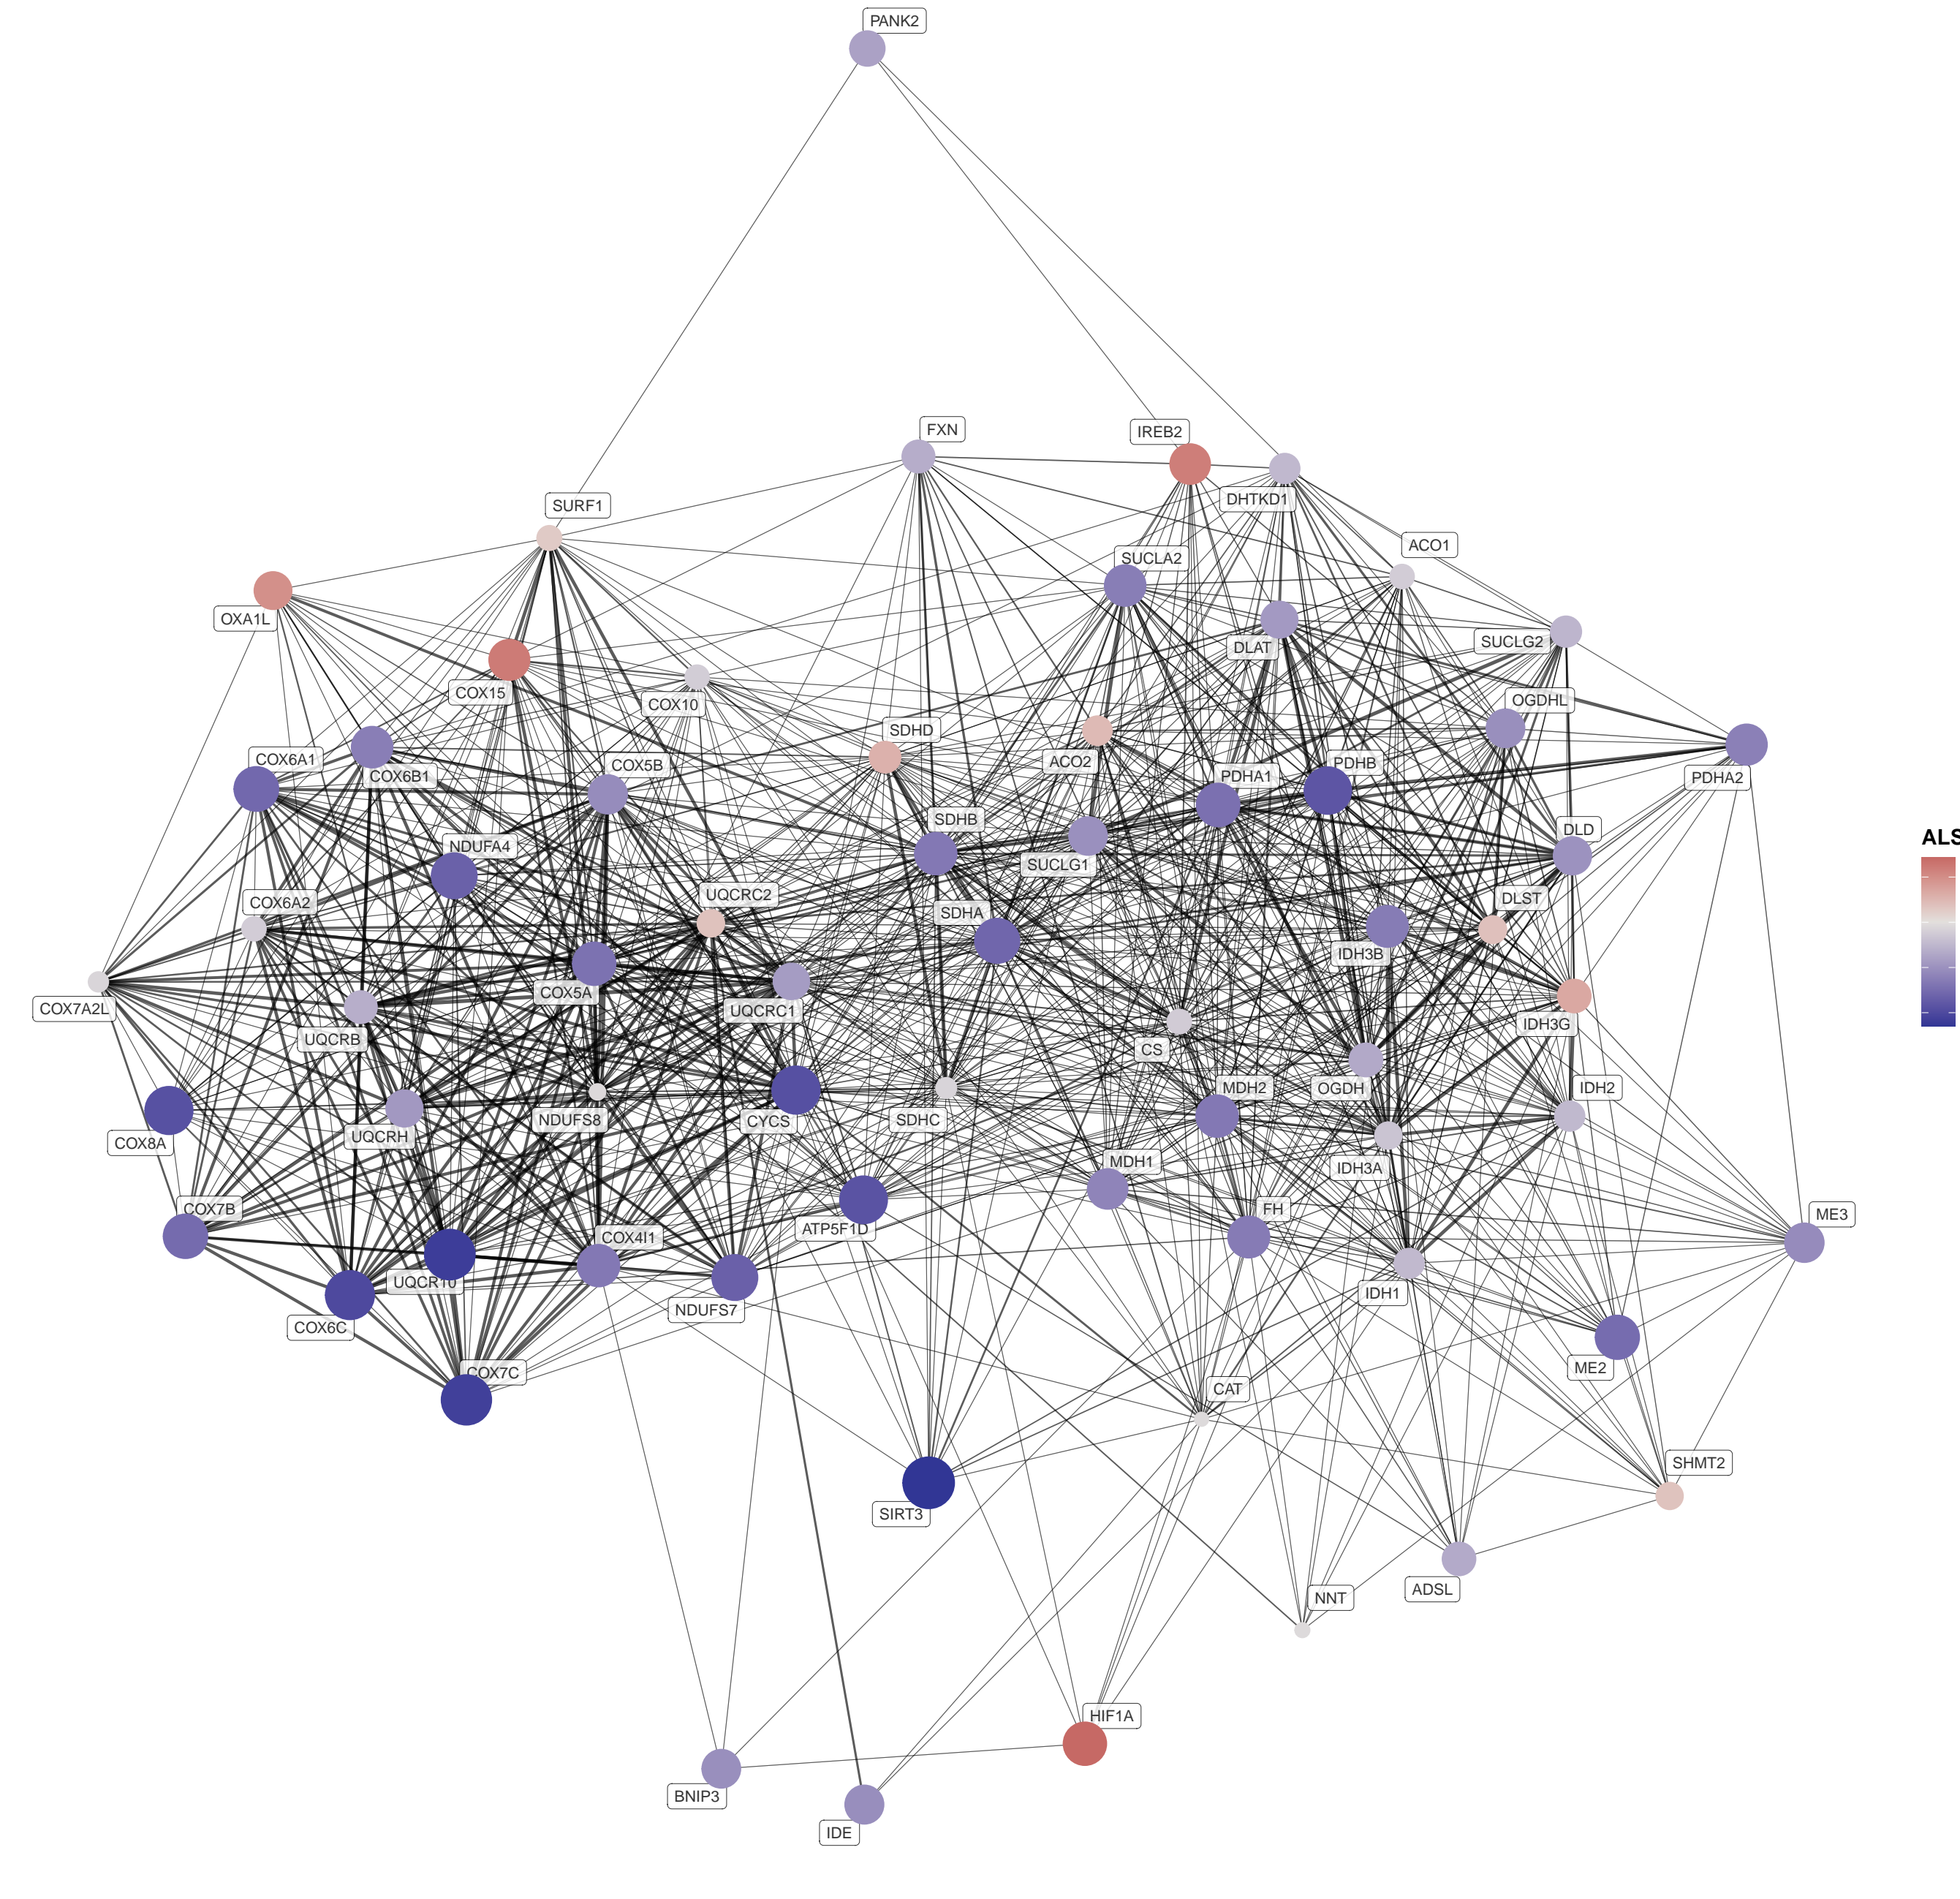

Supplement: NIHMS1658935-supplement-Figure_S2.pdf [file NIHMS1658935-supplement-Figure_S2.pdf]
